# Supplementary material
Source: Research Square preprint supplement (doi:10.21203/rs.3.rs-10161652/v1)
Supplement: Supplementary file 1 [file 5342c04fbf5df615a619af09.docx]

- This study combines the super efficiency SBM model, gravity model, coordination model, QAP model, and multi regional system dynamics model to construct a methodological framework for regional collaborative carbon reduction, with low economic growth constraints, high technology investment, and low energy intensity.
- This study quantified the regional collaborative carbon reduction effect and incorporated multiple regions into a unified SD research system to conduct multi regional collaborative carbon reduction research.
- This study systematically and comprehensively evaluates the regional collaborative carbon reduction effects under various scenarios through scenario combinations, in order to explore the most suitable carbon reduction path.
