# Supplementary material
Source: Research Square preprint supplement (doi:10.21203/rs.3.rs-10161652/v1)
Supplement: Supplementary file 2 [file 67806cf08f73b203aa5f6aba.docx]

# Appendix A Analysis of influencing factors of collaborative carbon emission reduction based on QAP

Regional coordinated advancement of carbon emission reduction is influenced and constrained by numerous factors. Drawing on relevant literature, these influencing factors can be categorized into different levels such as industry and economy, science & technology and education, and energy and environment, with each level containing several factor indicators. The specific classification and indicators are shown in Table A1.

Factors at the industry and economy level include: (1) Industrial structure. Cities with a lighter industrial structure and a higher proportion of the service sector tend to have relatively lower carbon emissions. During the process of industrial structure upgrading, inter-city industrial transfer, division of labor, and collaboration can promote the optimization and adjustment of the overall regional industrial structure, thereby achieving coordinated carbon emission reduction. (2) Economic development level and economic agglomeration degree. Cities with high economic development levels and high economic agglomeration are conducive to forming economies of scale and industrial synergy effects. Close economic ties between cities allow the positive externalities of economic development and agglomeration to radiate to surrounding areas, promoting coordinated carbon emission reduction. (3) Digital economy level. The application of digital technology can optimize urban energy management systems, achieve precise energy allocation, improve energy utilization efficiency, and reduce carbon emissions from traditional industries. Cities with developed digital economies can drive industrial digital improvement in surrounding cities through industrial linkages, promoting coordinated carbon emission reduction.

Factors at the science & technology and education level include: (1) Educational support. Cities rich in educational resources tend to have residents with stronger environmental awareness, enabling the formation of low-carbon lifestyles, while also cultivating a large number of professionals mastering environmental protection technologies for enterprises, promoting green innovation. Inter-city talent flow and educational exchanges promote coordinated carbon emission reduction. (2) Scientific and technological support and development. Technology is the core driving force for achieving carbon emission reduction. Advanced energy-saving, emission-reduction, and energy-efficient utilization technologies can reduce urban energy consumption and carbon emissions. Cities with high levels of technological development can help enhance the carbon reduction capabilities of surrounding cities through technology transfer, cooperative R&D, etc.

Factors at the energy and environment level include: (1) Energy structure. An energy structure dominated by clean energy can significantly reduce carbon emissions. Cities with superior energy structures can provide clean energy supply to surrounding cities or promote energy structure adjustment in surrounding areas through experience sharing. (2) Environmental regulation. Environmental regulations can compel urban enterprises to adopt environmentally friendly production technologies and measures to reduce carbon emissions, subsequently driving improvements in carbon reduction capabilities in surrounding cities through effects like technology spillover, achieving coordinated carbon reduction. However, differing regulatory standards might also lead to the cross-regional transfer of high-carbon emission enterprises. (3) Green space area. Urban green spaces have carbon sink functions, capable of absorbing carbon dioxide and reducing urban carbon emissions. Adjacent cities can expand the carbon sink scope through methods like constructing ecological corridors, achieving coordinated carbon emission reduction.

Factors at the social level include: (1) Geographical distance. Geographical distance affects the cost of factor flow between cities. Cities in close proximity have lower costs in technology exchange, industrial cooperation, and energy transportation, making coordinated carbon emission reduction easier to achieve. (2) Openness to the outside world. Cities with a high degree of openness can introduce advanced foreign environmental technologies, capital, and management experience, advancing their own carbon reduction process. Simultaneously, highly open cities influence the production and carbon reduction of cities in upstream and downstream industrial chains through international trade and investment. (3) Public service supply. High-quality public services, such as efficient public transportation systems, can reduce private car usage and lower carbon emissions. Inter-city optimization of cross-regional transportation networks can promote rational flow of people and goods, achieving coordinated carbon reduction on a larger scale. (4) Market scale. The interconnection of markets between cities can expand the market scale for environmental products and services, incentivizing enterprises to carry out carbon reduction actions over a wider range. (5) Population size. Cities with large populations have high total energy consumption, but by enhancing residents' environmental awareness and promoting green consumption, per capita carbon emissions can be reduced, and human support for carbon reduction technology innovation can be provided. Furthermore, population mobility between cities can spread environmental concepts and behaviors, thereby influencing coordinated carbon emission reduction. (6) Urbanization level. During urbanization, rational urban planning, such as promoting green buildings, can reduce building energy consumption and carbon emissions. Cities with different urbanization levels can optimize urbanization development models through exchange and learning, promoting coordinated carbon emission reduction.

**Table A1** Influencing factors and indicators for coordinated carbon emission reduction

| Dimension | Influencing Factor | Indicator | Unit |
| --- | --- | --- | --- |
| Industry & Economy | Industrial Structure | Proportion of Tertiary Industry | % |
| Economic Development | Gross Regional Product | 100 million yuan |
| Digital Economy Level | Telecom Business Volume | 10 thousand yuan |
| Science & Education | Sci & Tech Support | Science Expenditure | 10 thousand yuan |
| Sci & Tech Development | Number of Patent Applications | unit |
| Educational Support | Education Expenditure | 10 thousand yuan |
| Energy & Environment | Energy Structure | Electric Power Standard Coal Equivalent / Total Energy Consumption Standard Coal Equivalent | % |
| Environmental Regulation | Environmental Protection Expenditure | 10 thousand yuan |
| Green Space Area | Green Space Area | hectare |
| Society | Openness to Outside World | Actually Utilized Foreign Capital Amount | 10 thousand yuan |
| Public Service Supply | Annual Public Bus & Trolleybus Passenger Volume | 10,000 person-times |
| Market Scale | Total Retail Sales of Consumer Goods | 10 thousand yuan |
| Population Size | Permanent Population | 10,000 persons |
| Urbanization Level | Urbanization Rate | % |
| Economic Agglomeration | GRP / Area |  |

# Appendix B Construction of SD for a single city

The SD model of a single city can be divided into four mutually coupled subsystems: economic development, population and urbanization, energy consumption, and ecological environment governance. The causal relationships between these subsystems are intertwined.

The economic development subsystem is driven by the added value of the primary, secondary, and tertiary industries as the core. In the population and urbanization subsystem, the scale and structure of the permanent population affect the urbanization process, and the urbanization rate interacts with the economic development, energy consumption, and other subsystems. In the energy consumption subsystem, the total consumption and structure of various types of energy lead to changes in carbon emissions, and carbon emissions in turn restrict the adjustment of economic development models and energy structures. In the ecological environment governance subsystem, the increase in environmental protection investment can strengthen the control of pollutant emissions and promote the sustainable development of the economy and society by improving environmental quality.

The four subsystems form a multi - dimensional economy - population - energy - ecology system through multi - dimensional and in - depth coupling, reflecting the interaction mechanism and dynamic logic of various factors in carbon emission reduction construction. The flow and stock diagram of a single city i is shown in Figure 5 - 1.

On this basis, the logical relationships between variables are further constructed. The coefficients of the relationships are comprehensively determined through literature review, logical deduction, fitting regression, and other methods. The logical relationships corresponding to different cities are not the same. The main relationships for a single city i are as follows:

(1) GDP (100 million yuan) = Added Value of the Primary Industry (100 million yuan) + Added Value of the Secondary Industry (100 million yuan) + Added Value of the Tertiary Industry (100 million yuan)

(2) Total Energy Consumption (tons of standard coal) = 1.7143 × LPG Consumption (tons) + 13.3 × Natural Gas and Artificial Gas Consumption (10,000 cubic meters) + 1.229 × Total Electricity Consumption of the Whole Society (10,000 kWh)

(3) Labor Force Population (10,000 people) = β1i × Permanent Population (10,000 people) + β2i × Educational Expenditure (10,000 yuan) + β3i

(4) Fiscal Revenue (10,000 yuan) = γ1i × GDP (100 million yuan) + γ2i × Labor Force Population (10,000 people) + γ3i × Urbanization Rate + γ4i

(5) Industrial Smoke and Dust Emissions (tons) = ε1i × S&T Expenditure (10,000 yuan) + ε2i × Environmental Protection Expenditure (10,000 yuan) + ε3i × Total Energy Consumption (tons of standard coal) + ε4i × Green Space Area (hectare) + ε5i × GDP (100 million yuan) + ε6i

(6) Industrial Wastewater Discharges (10,000 tons) = λ1i × S&T Expenditure (10,000 yuan) + λ2i × Environmental Protection Expenditure (10,000 yuan) + λ3i × Total Energy Consumption (tons of standard coal) + λ4i × Green Space Area (hectare) + λ5i × GDP (100 million yuan) + λ6i

(7) Capital Stock (10,000 yuan) = α1i × GDP (100 million yuan) + α2i × Permanent Population (10,000 people) + α3i × Urbanization Rate + α4i

(8) Total Retail Sales of Consumer Goods (10,000 yuan) = μ1i × GDP (100 million yuan) + μ2i × Digital Economy Level (Total Telecommunication Business Volume, 10,000 yuan) + μ3i

(9) Highway Freight Volume (10,000 tons) = σ1i × GDP (100 million yuan) + σ2i × Total Retail Sales of Consumer Goods + σ3i

(10) Carbon Emissions (1 million tons) = θ1i × GDP (100 million yuan) + θ2i × Permanent Population (10,000 people) + θ3i × Total Energy Consumption + θ4i × Urbanization Rate + θ5i × Highway Freight Volume + θ6i

Taking a single city as a node in the collaborative carbon emission reduction network and the carbon emission reduction correlation between cities as the edge of the network, the collaborative carbon emission reduction effect index is calculated by integrating the index characteristics of the node and network levels and according to the quantitative method of the carbon emission reduction effect.

# Appendix C Selection of regulatory factors

Both the multi - regional SD model and the QAP method can analyze the influencing factors of collaborative carbon emission reduction. The sensitivity analysis results of the multi - regional SD model focus on revealing the effect of the intensity of influencing factors on the collaborative carbon emission reduction effect; the QAP analysis results focus on the impact of the regional differences of influencing factors on the collaborative carbon emission reduction effect. Based on this, the coupling of the two can scientifically identify the key influencing factors of collaborative carbon emission reduction and take them as the regulatory factors for the prediction and regulation analysis of the spatial SD model.

Among the economic and industrial influencing factors of each basin in the Yangtze River Economic Belt revealed by the QAP analysis, the industrial structure and economic agglomeration are the core elements. From the perspective of practical orientation, the focus of industrial structure optimization clearly lies in the secondary and tertiary industries: in the secondary industry, it is reflected in eliminating the production capacity of high - energy - consumption and high - emission industries and promoting the low - carbon transformation of industries; in the tertiary industry, it is reflected in vigorously developing green service industries such as green finance and improving the ecological value of industries. At the same time, economic agglomeration is also mainly presented in the spatial agglomeration form of the secondary and tertiary industries, such as industrial parks carrying industrial production and industrial clusters gathering service industry resources. In contrast, the primary industry not only has a relatively scattered layout and lacks significant agglomeration characteristics, but also its output value accounts for a relatively low proportion in the regional economy, resulting in a weak correlation between the industrial structure and economic agglomeration with the primary industry.

To sum up, the two key elements of industrial structure and economic agglomeration identified in the QAP analysis mainly correspond to the variables related to the secondary and tertiary industries in the sensitivity analysis. Therefore, by coupling the influencing factors of collaborative carbon emission reduction from the QAP and the influencing factors in the sensitivity analysis, the regulatory factors for the upper reaches of the Yangtze River Economic Belt are the added value of the secondary industry, the added value of the tertiary industry, and the urbanization rate; the regulatory factors for the middle reaches are the added value of the secondary industry, the added value of the tertiary industry, and the educational expenditure; and the regulatory factors for the lower reaches are the added value of the secondary industry, the added value of the tertiary industry, and the urbanization rate.

# Appendix D Scenario combination

Based on the differentiated regulatory factors of each basin, scenario settings are made for each regulatory factor in the future planning period (2024 - 2035), and each factor is set with three development scenarios: low (L), medium (M), and high (H). Among them, the medium scenario is the predicted value of each regulatory factor in the future planning period following the conventional development trend. The scenario values of each factor under the medium scenario are obtained by reviewing and sorting out urban development planning policies, or using time - series prediction methods such as trend extrapolation and ARIMA based on historical data, combined with expert consultation and reference to relevant suggestions. The low scenario represents a scenario where the development intensity of each regulatory factor is lower than the conventional trend, and the high scenario represents a scenario where the development intensity is higher than the conventional trend. The setting of the low and high scenarios is based on the adjustment and change of the growth rate of each factor in the medium scenario to a certain extent upward or downward. The setting values of the low and high scenarios for each factor are determined by referring to the settings in relevant similar literatures and expert consultation.

In specific implementation, according to the regulatory factors of the upper reaches, three scenario values (low, medium, and high) are set for each city in the upper reaches. Similarly, the middle and lower reaches also set scenarios for each city in their respective basins according to their own regulatory factors. The scenario settings of regulatory factors for each city in each basin involve a lot of content, and the specific scenario setting values are detailed in Appendices E - G. Among them, the added value of the secondary industry and the added value of the tertiary industry are the actual values based on 2007, both in billions of yuan.

On the basis of the scenario setting of regulatory factors, the possible scenarios are analyzed through scenario combination. Each basin contains three regulatory factors, and each regulatory factor is set with three scenarios (low, medium, and high). According to the principle of permutation and combination, there are 27 scenario combinations in each basin. These combinations are uniformly represented by three uppercase letters, and each letter from left to right corresponds to the scenario of each regulatory factor (low scenario is represented by "L", medium scenario by "M", and high scenario by "H"). For example, in the upper reaches, if the added value of the secondary industry of each city is set to the low scenario, the added value of the tertiary industry to the high scenario, and the urbanization rate to the medium scenario, this combination is expressed as "LHM"; another example is that in the middle reaches, if the added value of the secondary industry of each city is set to the medium scenario, the added value of the tertiary industry to the medium scenario, and the educational expenditure to the high scenario, this combination is expressed as "MMH".

On this basis, according to the different regulatory factors emphasized by the scenario combinations, the 27 scenario combinations in each basin are divided into two categories: single - factor preference and multi - factor preference, and each category is further divided into three sub - categories. The specific classification is detailed in Appendices E, F, and G.

At the same time, to more comprehensively evaluate each scenario combination below and improve the implementability of the results, the implementation difficulty of each scenario combination is quantified using Eq. (D1).

|  |  | （D1） |
| --- | --- | --- |

represents the implementation difficulty of a specific scenario combination in a certain basin, and a higher value indicates greater implementation difficulty.

respectively represent the weights of the three variables in the scenario combination, reflecting the relative importance of each variable in the scenario evaluation. The weight values can be set according to the research objectives and actual needs.

correspond to the level scores of the three variables. Among them, the high level is assigned a value of 1, the medium level 0.8, and the low level 0.6, which are used to quantify the level differences of the variables.

is the basin weight corresponding to the scenario combination, which is used to reflect the impact of differences in natural conditions, social and economic foundations, and other aspects of different basins on the implementation difficulty.

# Appendix E Upstream region scenario settings

**Table E.1** Scenario setting of low value added of the secondary industry in upstream areas

|  | 2024 | 2025 | 2026 | 2027 | 2028 | 2029 | 2030 | 2031 | 2032 | 2033 | 2034 | 2035 |
| --- | --- | --- | --- | --- | --- | --- | --- | --- | --- | --- | --- | --- |
| Chongqing | 9918 | 10522 | 11163 | 11843 | 12565 | 13330 | 14142 | 15003 | 15917 | 16887 | 17915 | 19007 |
| Kunming | 1973 | 2075 | 2181 | 2293 | 2410 | 2534 | 2664 | 2800 | 2944 | 3095 | 3254 | 3420 |
| Qujing | 913 | 941 | 969 | 997 | 1024 | 1052 | 1080 | 1107 | 1135 | 1162 | 1190 | 1217 |
| Yuxi | 766 | 796 | 827 | 859 | 893 | 927 | 963 | 1001 | 1040 | 1080 | 1122 | 1166 |
| Baoshan | 454 | 509 | 570 | 639 | 717 | 803 | 901 | 1010 | 1132 | 1269 | 1423 | 1596 |
| Zhaotong | 485 | 520 | 558 | 598 | 641 | 688 | 738 | 791 | 849 | 910 | 976 | 1047 |
| Lijiang | 168 | 181 | 194 | 208 | 223 | 239 | 256 | 275 | 295 | 316 | 339 | 364 |
| Pu'er | 223 | 232 | 242 | 251 | 260 | 269 | 278 | 287 | 296 | 304 | 313 | 322 |
| Lincang | 202 | 210 | 218 | 225 | 233 | 241 | 248 | 256 | 263 | 271 | 278 | 286 |
| Guiyang | 1686 | 1823 | 1972 | 2132 | 2305 | 2492 | 2695 | 2914 | 3150 | 3406 | 3683 | 3982 |
| Liupanshui | 624 | 645 | 666 | 686 | 707 | 728 | 748 | 769 | 789 | 810 | 830 | 851 |
| Zunyi | 1942 | 2152 | 2384 | 2641 | 2927 | 3242 | 3593 | 3980 | 4410 | 4886 | 5414 | 5998 |
| Anshun | 331 | 358 | 389 | 421 | 457 | 495 | 537 | 582 | 631 | 684 | 742 | 804 |
| Chengdu | 5439 | 5635 | 5830 | 6025 | 6220 | 6413 | 6606 | 6799 | 6991 | 7183 | 7374 | 7564 |
| Zigong | 578 | 594 | 609 | 624 | 639 | 654 | 669 | 684 | 699 | 714 | 729 | 744 |
| Panzhihua | 575 | 588 | 601 | 614 | 627 | 640 | 653 | 666 | 679 | 691 | 704 | 717 |
| Luzhou | 1042 | 1107 | 1177 | 1252 | 1331 | 1415 | 1505 | 1600 | 1701 | 1809 | 1923 | 2045 |
| Deyang | 1078 | 1130 | 1185 | 1242 | 1302 | 1366 | 1432 | 1501 | 1574 | 1651 | 1731 | 1815 |
| Mianyang | 1119 | 1187 | 1260 | 1337 | 1418 | 1505 | 1597 | 1694 | 1798 | 1908 | 2024 | 2148 |
| Guangyuan | 424 | 456 | 491 | 528 | 568 | 611 | 657 | 707 | 761 | 819 | 881 | 947 |
| Suining | 632 | 671 | 713 | 757 | 804 | 854 | 908 | 964 | 1024 | 1088 | 1155 | 1227 |
| Neijiang | 523 | 532 | 541 | 550 | 559 | 568 | 577 | 586 | 595 | 604 | 613 | 622 |
| Leshan | 737 | 758 | 779 | 800 | 821 | 843 | 864 | 885 | 905 | 926 | 947 | 968 |
| Nanchong | 846 | 877 | 907 | 938 | 969 | 999 | 1030 | 1060 | 1090 | 1121 | 1151 | 1181 |
| Meishan | 520 | 535 | 550 | 565 | 580 | 595 | 610 | 625 | 640 | 655 | 670 | 684 |
| Yibin | 1290 | 1377 | 1469 | 1568 | 1673 | 1785 | 1905 | 2033 | 2169 | 2314 | 2470 | 2635 |
| Guang'an | 463 | 477 | 491 | 505 | 518 | 532 | 546 | 559 | 573 | 586 | 600 | 613 |
| Dazhou | 644 | 662 | 680 | 699 | 717 | 735 | 753 | 771 | 789 | 807 | 825 | 843 |
| ya'an | 241 | 247 | 253 | 259 | 265 | 271 | 277 | 283 | 289 | 295 | 301 | 307 |
| Bazhong | 248 | 258 | 268 | 277 | 287 | 296 | 306 | 315 | 325 | 334 | 344 | 353 |
| Ziyang | 328 | 326 | 325 | 324 | 323 | 322 | 321 | 320 | 319 | 317 | 316 | 315 |

**Table E.2** Scenarios for the value added of the secondary industry in upstream areas

|  | 2024 | 2025 | 2026 | 2027 | 2028 | 2029 | 2030 | 2031 | 2032 | 2033 | 2034 | 2035 |
| --- | --- | --- | --- | --- | --- | --- | --- | --- | --- | --- | --- | --- |
| Chongqing | 10112 | 10789 | 11511 | 12282 | 13104 | 13981 | 14917 | 15915 | 16980 | 18117 | 19330 | 20623 |
| Kunming | 2009 | 2122 | 2241 | 2368 | 2501 | 2642 | 2791 | 2948 | 3114 | 3289 | 3475 | 3671 |
| Qujing | 926 | 957 | 988 | 1020 | 1051 | 1082 | 1113 | 1145 | 1176 | 1207 | 1238 | 1270 |
| Yuxi | 778 | 812 | 846 | 882 | 920 | 959 | 1000 | 1043 | 1087 | 1134 | 1182 | 1233 |
| Baoshan | 467 | 529 | 600 | 680 | 770 | 873 | 989 | 1120 | 1269 | 1438 | 1630 | 1847 |
| Zhaotong | 495 | 535 | 577 | 623 | 673 | 727 | 784 | 847 | 914 | 987 | 1066 | 1151 |
| Lijiang | 172 | 186 | 201 | 217 | 234 | 252 | 273 | 294 | 318 | 343 | 371 | 400 |
| Pu'er | 227 | 237 | 247 | 258 | 268 | 278 | 288 | 299 | 309 | 319 | 329 | 339 |
| Lincang | 205 | 214 | 223 | 231 | 240 | 249 | 257 | 266 | 275 | 283 | 292 | 301 |
| Guiyang | 1725 | 1879 | 2047 | 2230 | 2429 | 2646 | 2882 | 3139 | 3420 | 3725 | 4057 | 4420 |
| Liupanshui | 633 | 657 | 680 | 703 | 727 | 750 | 773 | 797 | 820 | 843 | 866 | 890 |
| Zunyi | 1996 | 2232 | 2497 | 2793 | 3125 | 3496 | 3910 | 4374 | 4893 | 5474 | 6123 | 6849 |
| Anshun | 338 | 370 | 404 | 441 | 482 | 527 | 575 | 629 | 687 | 750 | 820 | 895 |
| Chengdu | 5523 | 5742 | 5961 | 6180 | 6399 | 6618 | 6837 | 7056 | 7275 | 7494 | 7712 | 7931 |
| Zigong | 586 | 603 | 620 | 637 | 654 | 671 | 688 | 705 | 722 | 739 | 755 | 772 |
| Panzhihua | 582 | 597 | 611 | 626 | 640 | 655 | 669 | 684 | 698 | 713 | 727 | 742 |
| Luzhou | 1062 | 1136 | 1215 | 1300 | 1390 | 1487 | 1590 | 1700 | 1819 | 1945 | 2080 | 2225 |
| Deyang | 1096 | 1155 | 1216 | 1281 | 1349 | 1421 | 1497 | 1577 | 1661 | 1750 | 1843 | 1941 |
| Mianyang | 1141 | 1217 | 1299 | 1386 | 1479 | 1579 | 1684 | 1798 | 1918 | 2047 | 2184 | 2331 |
| Guangyuan | 433 | 469 | 508 | 551 | 597 | 647 | 700 | 759 | 822 | 891 | 965 | 1045 |
| Suining | 644 | 689 | 736 | 786 | 840 | 897 | 958 | 1024 | 1094 | 1168 | 1248 | 1333 |
| Neijiang | 529 | 539 | 549 | 559 | 570 | 580 | 590 | 600 | 610 | 620 | 630 | 640 |
| Leshan | 747 | 771 | 794 | 818 | 842 | 866 | 889 | 913 | 937 | 961 | 984 | 1008 |
| Nanchong | 859 | 893 | 928 | 962 | 997 | 1031 | 1066 | 1101 | 1135 | 1170 | 1204 | 1239 |
| Meishan | 527 | 544 | 561 | 578 | 595 | 611 | 628 | 645 | 662 | 679 | 696 | 713 |
| Yibin | 1317 | 1414 | 1518 | 1630 | 1750 | 1879 | 2018 | 2166 | 2326 | 2498 | 2682 | 2879 |
| Guang'an | 470 | 485 | 501 | 516 | 531 | 547 | 562 | 577 | 593 | 608 | 624 | 639 |
| Dazhou | 652 | 673 | 693 | 714 | 734 | 755 | 775 | 796 | 817 | 837 | 858 | 878 |
| ya'an | 244 | 251 | 257 | 264 | 271 | 278 | 284 | 291 | 298 | 305 | 311 | 318 |
| Bazhong | 252 | 263 | 274 | 285 | 296 | 306 | 317 | 328 | 339 | 349 | 360 | 371 |
| Ziyang | 330 | 329 | 328 | 327 | 326 | 325 | 324 | 323 | 322 | 321 | 320 | 319 |

**Table E.3** High value added scenario of secondary industry in upstream areas

|  | 2024 | 2025 | 2026 | 2027 | 2028 | 2029 | 2030 | 2031 | 2032 | 2033 | 2034 | 2035 |
| --- | --- | --- | --- | --- | --- | --- | --- | --- | --- | --- | --- | --- |
| Chongqing | 10308 | 11060 | 11867 | 12733 | 13662 | 14659 | 15729 | 16876 | 18107 | 19429 | 20846 | 22367 |
| Kunming | 2044 | 2170 | 2303 | 2444 | 2594 | 2754 | 2923 | 3102 | 3293 | 3495 | 3710 | 3938 |
| Qujing | 939 | 974 | 1008 | 1043 | 1078 | 1113 | 1148 | 1183 | 1218 | 1253 | 1289 | 1324 |
| Yuxi | 790 | 827 | 866 | 906 | 948 | 992 | 1038 | 1087 | 1137 | 1190 | 1246 | 1304 |
| Baoshan | 481 | 551 | 630 | 722 | 827 | 947 | 1084 | 1241 | 1422 | 1628 | 1864 | 2135 |
| Zhaotong | 506 | 550 | 597 | 649 | 706 | 767 | 834 | 906 | 985 | 1070 | 1163 | 1265 |
| Lijiang | 176 | 191 | 208 | 226 | 245 | 267 | 290 | 315 | 342 | 372 | 404 | 440 |
| Pu'er | 231 | 242 | 253 | 265 | 276 | 288 | 299 | 311 | 322 | 334 | 346 | 357 |
| Lincang | 209 | 218 | 228 | 237 | 247 | 257 | 267 | 276 | 286 | 296 | 306 | 316 |
| Guiyang | 1765 | 1937 | 2125 | 2332 | 2559 | 2808 | 3081 | 3381 | 3710 | 4071 | 4467 | 4902 |
| Liupanshui | 643 | 668 | 694 | 720 | 746 | 772 | 799 | 825 | 851 | 878 | 904 | 931 |
| Zunyi | 2050 | 2315 | 2615 | 2953 | 3335 | 3766 | 4253 | 4803 | 5424 | 6125 | 6917 | 7812 |
| Anshun | 346 | 381 | 420 | 462 | 509 | 560 | 616 | 678 | 747 | 822 | 905 | 996 |
| Chengdu | 5607 | 5850 | 6093 | 6337 | 6582 | 6827 | 7074 | 7321 | 7568 | 7817 | 8065 | 8315 |
| Zigong | 594 | 613 | 631 | 650 | 669 | 688 | 707 | 726 | 745 | 764 | 783 | 802 |
| Panzhihua | 590 | 606 | 622 | 638 | 654 | 670 | 686 | 702 | 719 | 735 | 751 | 768 |
| Luzhou | 1083 | 1165 | 1254 | 1349 | 1451 | 1561 | 1679 | 1806 | 1943 | 2090 | 2249 | 2419 |
| Deyang | 1115 | 1180 | 1248 | 1321 | 1398 | 1479 | 1565 | 1656 | 1752 | 1854 | 1962 | 2076 |
| Mianyang | 1163 | 1248 | 1339 | 1437 | 1542 | 1655 | 1776 | 1906 | 2046 | 2195 | 2356 | 2528 |
| Guangyuan | 443 | 483 | 527 | 575 | 627 | 684 | 746 | 814 | 888 | 969 | 1057 | 1153 |
| Suining | 657 | 706 | 759 | 815 | 876 | 941 | 1011 | 1087 | 1167 | 1254 | 1348 | 1448 |
| Neijiang | 535 | 546 | 558 | 569 | 580 | 591 | 602 | 613 | 625 | 636 | 647 | 658 |
| Leshan | 757 | 783 | 810 | 836 | 863 | 889 | 916 | 942 | 969 | 996 | 1023 | 1050 |
| Nanchong | 872 | 910 | 949 | 987 | 1026 | 1064 | 1103 | 1142 | 1181 | 1221 | 1260 | 1299 |
| Meishan | 534 | 553 | 572 | 590 | 609 | 628 | 647 | 666 | 685 | 704 | 723 | 742 |
| Yibin | 1344 | 1452 | 1568 | 1694 | 1831 | 1978 | 2137 | 2308 | 2494 | 2694 | 2911 | 3145 |
| Guang'an | 476 | 493 | 511 | 528 | 545 | 562 | 579 | 596 | 614 | 631 | 648 | 666 |
| Dazhou | 661 | 684 | 707 | 730 | 752 | 775 | 798 | 821 | 844 | 867 | 891 | 914 |
| ya'an | 247 | 255 | 262 | 270 | 277 | 284 | 292 | 300 | 307 | 315 | 322 | 330 |
| Bazhong | 256 | 268 | 280 | 292 | 304 | 317 | 329 | 341 | 353 | 365 | 378 | 390 |
| Ziyang | 333 | 332 | 331 | 330 | 329 | 328 | 328 | 327 | 326 | 325 | 324 | 323 |

**Table E.4** Low scenario of added value of the tertiary industry in upstream areas

|  | 2024 | 2025 | 2026 | 2027 | 2028 | 2029 | 2030 | 2031 | 2032 | 2033 | 2034 | 2035 |
| --- | --- | --- | --- | --- | --- | --- | --- | --- | --- | --- | --- | --- |
| Chongqing | 16356 | 18206 | 20264 | 22555 | 25106 | 27944 | 31104 | 34621 | 38535 | 42892 | 47742 | 53140 |
| Kunming | 4674 | 5189 | 5762 | 6398 | 7103 | 7887 | 8757 | 9723 | 10796 | 11987 | 13310 | 14778 |
| Qujing | 1478 | 1672 | 1891 | 2140 | 2421 | 2739 | 3099 | 3506 | 3966 | 4487 | 5077 | 5744 |
| Yuxi | 1095 | 1240 | 1404 | 1589 | 1799 | 2037 | 2307 | 2611 | 2957 | 3347 | 3790 | 4291 |
| Baoshan | 451 | 501 | 555 | 616 | 683 | 757 | 840 | 932 | 1033 | 1146 | 1271 | 1409 |
| Zhaotong | 634 | 716 | 807 | 911 | 1028 | 1160 | 1309 | 1478 | 1667 | 1881 | 2123 | 2396 |
| Lijiang | 293 | 329 | 369 | 413 | 463 | 519 | 582 | 652 | 731 | 819 | 918 | 1029 |
| Pu'er | 545 | 624 | 715 | 819 | 939 | 1075 | 1232 | 1411 | 1616 | 1851 | 2120 | 2429 |
| Lincang | 459 | 522 | 595 | 677 | 770 | 876 | 997 | 1135 | 1291 | 1469 | 1672 | 1903 |
| Guiyang | 3042 | 3359 | 3709 | 4096 | 4523 | 4995 | 5516 | 6091 | 6726 | 7427 | 8201 | 9057 |
| Liupanshui | 582 | 609 | 635 | 661 | 687 | 713 | 739 | 765 | 790 | 816 | 842 | 867 |
| Zunyi | 1801 | 1999 | 2220 | 2466 | 2738 | 3041 | 3377 | 3750 | 4164 | 4624 | 5135 | 5702 |
| Anshun | 625 | 696 | 775 | 864 | 962 | 1072 | 1195 | 1331 | 1483 | 1652 | 1840 | 2050 |
| Chengdu | 13339 | 14897 | 16635 | 18577 | 20746 | 23168 | 25872 | 28892 | 32265 | 36032 | 40238 | 44935 |
| Zigong | 733 | 805 | 884 | 971 | 1067 | 1172 | 1287 | 1414 | 1553 | 1706 | 1874 | 2058 |
| Panzhihua | 428 | 466 | 507 | 552 | 601 | 655 | 713 | 776 | 846 | 921 | 1003 | 1092 |
| Luzhou | 986 | 1108 | 1244 | 1396 | 1568 | 1760 | 1976 | 2219 | 2491 | 2797 | 3141 | 3527 |
| Deyang | 1179 | 1314 | 1465 | 1633 | 1820 | 2029 | 2262 | 2521 | 2811 | 3133 | 3493 | 3894 |
| Mianyang | 1708 | 1933 | 2187 | 2475 | 2801 | 3169 | 3586 | 4057 | 4591 | 5195 | 5878 | 6651 |
| Guangyuan | 452 | 497 | 547 | 602 | 662 | 729 | 802 | 882 | 971 | 1068 | 1175 | 1293 |
| Suining | 658 | 735 | 821 | 916 | 1023 | 1143 | 1276 | 1425 | 1591 | 1776 | 1983 | 2215 |
| Neijiang | 860 | 973 | 1101 | 1246 | 1409 | 1594 | 1803 | 2040 | 2308 | 2611 | 2953 | 3341 |
| Leshan | 1060 | 1190 | 1336 | 1500 | 1685 | 1892 | 2124 | 2386 | 2679 | 3008 | 3378 | 3793 |
| Nanchong | 1207 | 1358 | 1527 | 1718 | 1933 | 2174 | 2446 | 2752 | 3096 | 3483 | 3918 | 4408 |
| Meishan | 797 | 898 | 1010 | 1137 | 1280 | 1441 | 1621 | 1825 | 2054 | 2312 | 2602 | 2929 |
| Yibin | 1325 | 1512 | 1726 | 1970 | 2248 | 2565 | 2928 | 3342 | 3814 | 4353 | 4968 | 5670 |
| Guang'an | 713 | 790 | 876 | 970 | 1075 | 1192 | 1321 | 1463 | 1622 | 1797 | 1992 | 2207 |
| Dazhou | 1210 | 1368 | 1547 | 1749 | 1977 | 2235 | 2527 | 2857 | 3230 | 3652 | 4129 | 4668 |
| ya'an | 450 | 512 | 583 | 663 | 754 | 858 | 976 | 1111 | 1264 | 1438 | 1636 | 1861 |
| Bazhong | 377 | 416 | 458 | 504 | 555 | 612 | 673 | 742 | 817 | 900 | 991 | 1091 |
| Ziyang | 410 | 436 | 465 | 495 | 527 | 562 | 598 | 637 | 679 | 723 | 770 | 821 |

**Table E.5** Scenarios for the value added of the third industry in upstream areas

|  | 2024 | 2025 | 2026 | 2027 | 2028 | 2029 | 2030 | 2031 | 2032 | 2033 | 2034 | 2035 |
| --- | --- | --- | --- | --- | --- | --- | --- | --- | --- | --- | --- | --- |
| Chongqing | 16821 | 18911 | 21261 | 23903 | 26873 | 30211 | 33965 | 38185 | 42930 | 48264 | 54261 | 61002 |
| Kunming | 4804 | 5387 | 6040 | 6772 | 7593 | 8514 | 9546 | 10704 | 12001 | 13456 | 15087 | 16917 |
| Qujing | 1524 | 1744 | 1996 | 2284 | 2613 | 2991 | 3422 | 3917 | 4482 | 5129 | 5869 | 6717 |
| Yuxi | 1130 | 1294 | 1482 | 1697 | 1943 | 2226 | 2549 | 2919 | 3343 | 3829 | 4385 | 5022 |
| Baoshan | 464 | 519 | 582 | 651 | 729 | 817 | 915 | 1025 | 1147 | 1285 | 1439 | 1611 |
| Zhaotong | 654 | 746 | 851 | 971 | 1109 | 1265 | 1444 | 1647 | 1880 | 2145 | 2448 | 2793 |
| Lijiang | 302 | 342 | 388 | 439 | 497 | 564 | 638 | 723 | 819 | 928 | 1051 | 1191 |
| Pu'er | 563 | 654 | 758 | 879 | 1020 | 1183 | 1372 | 1591 | 1846 | 2141 | 2483 | 2880 |
| Lincang | 474 | 546 | 629 | 724 | 834 | 960 | 1106 | 1273 | 1466 | 1689 | 1945 | 2239 |
| Guiyang | 3124 | 3482 | 3881 | 4326 | 4821 | 5374 | 5989 | 6676 | 7440 | 8293 | 9243 | 10302 |
| Liupanshui | 592 | 622 | 651 | 681 | 710 | 740 | 769 | 799 | 828 | 858 | 887 | 917 |
| Zunyi | 1851 | 2076 | 2328 | 2610 | 2927 | 3283 | 3681 | 4128 | 4629 | 5191 | 5822 | 6528 |
| Anshun | 643 | 723 | 814 | 916 | 1031 | 1160 | 1305 | 1469 | 1653 | 1860 | 2093 | 2356 |
| Chengdu | 13726 | 15487 | 17474 | 19715 | 22245 | 25098 | 28318 | 31950 | 36049 | 40673 | 45891 | 51777 |
| Zigong | 752 | 833 | 924 | 1023 | 1134 | 1257 | 1393 | 1543 | 1710 | 1895 | 2100 | 2327 |
| Panzhihua | 438 | 481 | 528 | 580 | 636 | 698 | 767 | 842 | 924 | 1014 | 1113 | 1222 |
| Luzhou | 1016 | 1153 | 1309 | 1485 | 1686 | 1913 | 2171 | 2464 | 2797 | 3174 | 3603 | 4089 |
| Deyang | 1212 | 1365 | 1538 | 1731 | 1950 | 2196 | 2473 | 2784 | 3136 | 3531 | 3976 | 4478 |
| Mianyang | 1762 | 2017 | 2308 | 2642 | 3024 | 3461 | 3961 | 4533 | 5188 | 5938 | 6796 | 7779 |
| Guangyuan | 463 | 515 | 571 | 634 | 704 | 782 | 868 | 964 | 1070 | 1189 | 1320 | 1465 |
| Suining | 677 | 764 | 862 | 972 | 1097 | 1238 | 1396 | 1575 | 1777 | 2005 | 2262 | 2552 |
| Neijiang | 887 | 1015 | 1162 | 1329 | 1521 | 1741 | 1992 | 2279 | 2608 | 2984 | 3414 | 3906 |
| Leshan | 1091 | 1239 | 1406 | 1596 | 1812 | 2056 | 2334 | 2650 | 3007 | 3414 | 3875 | 4398 |
| Nanchong | 1243 | 1414 | 1608 | 1829 | 2081 | 2366 | 2691 | 3061 | 3481 | 3959 | 4503 | 5121 |
| Meishan | 822 | 935 | 1064 | 1211 | 1378 | 1568 | 1784 | 2031 | 2311 | 2630 | 2992 | 3405 |
| Yibin | 1368 | 1581 | 1826 | 2110 | 2438 | 2816 | 3253 | 3759 | 4342 | 5016 | 5795 | 6695 |
| Guang'an | 733 | 820 | 917 | 1026 | 1148 | 1285 | 1438 | 1609 | 1800 | 2014 | 2253 | 2521 |
| Dazhou | 1248 | 1427 | 1632 | 1866 | 2134 | 2440 | 2790 | 3190 | 3648 | 4171 | 4770 | 5455 |
| ya'an | 465 | 535 | 616 | 709 | 817 | 940 | 1083 | 1246 | 1435 | 1652 | 1902 | 2190 |
| Bazhong | 387 | 431 | 478 | 532 | 591 | 657 | 730 | 811 | 902 | 1002 | 1114 | 1238 |
| Ziyang | 418 | 448 | 480 | 514 | 551 | 591 | 633 | 678 | 727 | 779 | 835 | 895 |

**Table E.6** High value added scenario of the third industry in upstream areas

|  | 2024 | 2025 | 2026 | 2027 | 2028 | 2029 | 2030 | 2031 | 2032 | 2033 | 2034 | 2035 |
| --- | --- | --- | --- | --- | --- | --- | --- | --- | --- | --- | --- | --- |
| Chongqing | 17295 | 19637 | 22297 | 25316 | 28745 | 32638 | 37058 | 42077 | 47775 | 54246 | 61592 | 69934 |
| Kunming | 4938 | 5590 | 6329 | 7165 | 8112 | 9184 | 10398 | 11772 | 13327 | 15088 | 17082 | 19340 |
| Qujing | 1571 | 1818 | 2105 | 2436 | 2819 | 3263 | 3776 | 4370 | 5058 | 5854 | 6775 | 7841 |
| Yuxi | 1165 | 1349 | 1563 | 1810 | 2097 | 2429 | 2813 | 3259 | 3775 | 4372 | 5065 | 5867 |
| Baoshan | 477 | 539 | 609 | 689 | 779 | 881 | 996 | 1126 | 1273 | 1439 | 1627 | 1840 |
| Zhaotong | 674 | 777 | 897 | 1035 | 1194 | 1378 | 1590 | 1834 | 2117 | 2442 | 2818 | 3252 |
| Lijiang | 311 | 356 | 407 | 466 | 534 | 611 | 700 | 801 | 917 | 1050 | 1202 | 1376 |
| Pu'er | 582 | 684 | 803 | 943 | 1107 | 1300 | 1526 | 1792 | 2104 | 2471 | 2902 | 3407 |
| Lincang | 489 | 570 | 664 | 774 | 902 | 1051 | 1225 | 1427 | 1663 | 1938 | 2258 | 2631 |
| Guiyang | 3208 | 3608 | 4059 | 4566 | 5136 | 5777 | 6499 | 7310 | 8223 | 9250 | 10406 | 11705 |
| Liupanshui | 603 | 635 | 668 | 701 | 734 | 768 | 801 | 834 | 868 | 902 | 935 | 969 |
| Zunyi | 1902 | 2154 | 2439 | 2762 | 3127 | 3541 | 4010 | 4541 | 5141 | 5822 | 6592 | 7465 |
| Anshun | 661 | 751 | 854 | 970 | 1103 | 1254 | 1425 | 1620 | 1841 | 2093 | 2379 | 2704 |
| Chengdu | 14121 | 16095 | 18346 | 20911 | 23835 | 27168 | 30966 | 35296 | 40231 | 45857 | 52268 | 59577 |
| Zigong | 771 | 862 | 964 | 1078 | 1205 | 1347 | 1505 | 1683 | 1881 | 2103 | 2351 | 2628 |
| Panzhihua | 449 | 497 | 549 | 608 | 673 | 744 | 824 | 911 | 1009 | 1116 | 1235 | 1366 |
| Luzhou | 1046 | 1200 | 1376 | 1579 | 1811 | 2078 | 2383 | 2734 | 3136 | 3597 | 4126 | 4733 |
| Deyang | 1247 | 1418 | 1613 | 1835 | 2087 | 2374 | 2701 | 3072 | 3494 | 3974 | 4521 | 5142 |
| Mianyang | 1817 | 2103 | 2434 | 2818 | 3262 | 3775 | 4370 | 5059 | 5856 | 6778 | 7846 | 9082 |
| Guangyuan | 476 | 533 | 597 | 669 | 749 | 839 | 940 | 1053 | 1180 | 1321 | 1480 | 1658 |
| Suining | 697 | 794 | 905 | 1031 | 1175 | 1340 | 1527 | 1740 | 1983 | 2260 | 2576 | 2936 |
| Neijiang | 915 | 1059 | 1225 | 1418 | 1641 | 1899 | 2197 | 2543 | 2942 | 3405 | 3940 | 4560 |
| Leshan | 1124 | 1289 | 1479 | 1697 | 1947 | 2233 | 2562 | 2939 | 3372 | 3869 | 4438 | 5092 |
| Nanchong | 1281 | 1472 | 1693 | 1946 | 2238 | 2573 | 2958 | 3400 | 3910 | 4495 | 5168 | 5941 |
| Meishan | 846 | 974 | 1120 | 1289 | 1482 | 1705 | 1962 | 2257 | 2596 | 2987 | 3436 | 3952 |
| Yibin | 1413 | 1652 | 1932 | 2259 | 2641 | 3088 | 3611 | 4222 | 4936 | 5771 | 6748 | 7890 |
| Guang'an | 753 | 850 | 961 | 1085 | 1226 | 1384 | 1564 | 1766 | 1995 | 2254 | 2546 | 2875 |
| Dazhou | 1286 | 1488 | 1720 | 1989 | 2301 | 2660 | 3077 | 3558 | 4114 | 4758 | 5502 | 6363 |
| ya'an | 480 | 559 | 651 | 758 | 883 | 1029 | 1199 | 1397 | 1627 | 1895 | 2208 | 2572 |
| Bazhong | 398 | 446 | 500 | 561 | 629 | 705 | 791 | 887 | 994 | 1115 | 1250 | 1402 |
| Ziyang | 426 | 460 | 496 | 534 | 576 | 621 | 670 | 722 | 778 | 839 | 905 | 975 |

**Table E.7** Scenario of low urbanization rate in upstream areas (%)

|  | 2024 | 2025 | 2026 | 2027 | 2028 | 2029 | 2030 | 2031 | 2032 | 2033 | 2034 | 2035 |
| --- | --- | --- | --- | --- | --- | --- | --- | --- | --- | --- | --- | --- |
| Chongqing | 72.55 | 73.52 | 74.44 | 75.33 | 76.18 | 77.00 | 77.78 | 78.54 | 79.26 | 79.95 | 80.62 | 81.25 |
| Kunming | 81.03 | 81.87 | 82.67 | 83.43 | 84.15 | 84.83 | 85.48 | 86.09 | 86.67 | 87.22 | 87.75 | 88.24 |
| Qujing | 54.06 | 55.03 | 55.98 | 56.91 | 57.81 | 58.69 | 59.55 | 60.39 | 61.21 | 62.00 | 62.78 | 63.54 |
| Yuxi | 58.41 | 59.46 | 60.48 | 61.47 | 62.43 | 63.36 | 64.26 | 65.14 | 65.99 | 66.82 | 67.62 | 68.40 |
| Baoshan | 40.97 | 41.88 | 42.77 | 43.65 | 44.51 | 45.35 | 46.18 | 46.99 | 47.78 | 48.57 | 49.33 | 50.09 |
| Zhaotong | 43.36 | 44.60 | 45.80 | 46.97 | 48.11 | 49.22 | 50.30 | 51.35 | 52.38 | 53.37 | 54.35 | 55.29 |
| Lijiang | 50.43 | 51.67 | 52.88 | 54.05 | 55.18 | 56.28 | 57.35 | 58.39 | 59.39 | 60.37 | 61.32 | 62.24 |
| Pu'er | 45.23 | 45.84 | 46.43 | 47.00 | 47.56 | 48.11 | 48.64 | 49.17 | 49.67 | 50.17 | 50.66 | 51.13 |
| Lincang | 42.84 | 43.49 | 44.13 | 44.75 | 45.36 | 45.95 | 46.52 | 47.08 | 47.63 | 48.17 | 48.69 | 49.20 |
| Guiyang | 80.73 | 81.37 | 81.98 | 82.57 | 83.13 | 83.68 | 84.20 | 84.70 | 85.19 | 85.65 | 86.10 | 86.53 |
| Liupanshui | 52.25 | 53.41 | 54.51 | 55.54 | 56.53 | 57.46 | 58.35 | 59.20 | 60.00 | 60.77 | 61.51 | 62.21 |
| Zunyi | 62.28 | 63.61 | 64.89 | 66.11 | 67.29 | 68.41 | 69.49 | 70.53 | 71.52 | 72.47 | 73.39 | 74.26 |
| Anshun | 60.15 | 62.07 | 63.88 | 65.59 | 67.20 | 68.72 | 70.15 | 71.51 | 72.79 | 74.00 | 75.14 | 76.22 |
| Chengdu | 79.78 | 80.51 | 81.21 | 81.89 | 82.53 | 83.14 | 83.73 | 84.30 | 84.84 | 85.36 | 85.86 | 86.34 |
| Zigong | 58.72 | 59.67 | 60.60 | 61.51 | 62.38 | 63.24 | 64.07 | 64.88 | 65.67 | 66.44 | 67.18 | 67.91 |
| Panzhihua | 70.63 | 71.21 | 71.78 | 72.34 | 72.88 | 73.41 | 73.92 | 74.43 | 74.92 | 75.41 | 75.88 | 76.34 |
| Luzhou | 54.93 | 55.80 | 56.65 | 57.48 | 58.29 | 59.08 | 59.86 | 60.61 | 61.36 | 62.08 | 62.79 | 63.48 |
| Deyang | 59.15 | 60.11 | 61.05 | 61.96 | 62.84 | 63.70 | 64.54 | 65.35 | 66.14 | 66.91 | 67.66 | 68.39 |
| Mianyang | 57.14 | 58.04 | 58.92 | 59.77 | 60.60 | 61.42 | 62.21 | 62.98 | 63.74 | 64.48 | 65.19 | 65.89 |
| Guangyuan | 51.53 | 52.53 | 53.51 | 54.46 | 55.39 | 56.30 | 57.18 | 58.05 | 58.89 | 59.71 | 60.51 | 61.30 |
| Suining | 59.52 | 60.66 | 61.75 | 62.81 | 63.84 | 64.83 | 65.79 | 66.72 | 67.61 | 68.48 | 69.32 | 70.14 |
| Neijiang | 53.77 | 54.58 | 55.37 | 56.15 | 56.91 | 57.66 | 58.39 | 59.11 | 59.81 | 60.49 | 61.17 | 61.82 |
| Leshan | 57.32 | 58.26 | 59.18 | 60.07 | 60.94 | 61.79 | 62.62 | 63.42 | 64.20 | 64.97 | 65.71 | 66.44 |
| Nanchong | 54.31 | 55.30 | 56.26 | 57.20 | 58.11 | 59.01 | 59.87 | 60.72 | 61.55 | 62.35 | 63.13 | 63.90 |
| Meishan | 53.76 | 54.83 | 55.87 | 56.88 | 57.87 | 58.82 | 59.76 | 60.66 | 61.54 | 62.40 | 63.23 | 64.05 |
| Yibin | 55.92 | 56.92 | 57.89 | 58.83 | 59.75 | 60.65 | 61.52 | 62.37 | 63.20 | 64.00 | 64.78 | 65.55 |
| Guang'an | 48.74 | 49.81 | 50.86 | 51.87 | 52.87 | 53.84 | 54.78 | 55.70 | 56.60 | 57.48 | 58.33 | 59.17 |
| Dazhou | 60.65 | 61.71 | 62.71 | 63.65 | 64.54 | 65.38 | 66.17 | 66.92 | 67.64 | 68.32 | 68.96 | 69.58 |
| ya'an | 55.50 | 56.61 | 57.69 | 58.74 | 59.76 | 60.75 | 61.71 | 62.64 | 63.54 | 64.42 | 65.27 | 66.10 |
| Bazhong | 49.69 | 50.78 | 51.85 | 52.90 | 53.91 | 54.90 | 55.86 | 56.80 | 57.71 | 58.60 | 59.47 | 60.32 |
| Ziyang | 46.14 | 46.89 | 47.63 | 48.35 | 49.06 | 49.76 | 50.45 | 51.13 | 51.79 | 52.45 | 53.09 | 53.73 |

**Table E.8** Scenario of urbanization rate in upstream areas (%)

|  | 2024 | 2025 | 2026 | 2027 | 2028 | 2029 | 2030 | 2031 | 2032 | 2033 | 2034 | 2035 |
| --- | --- | --- | --- | --- | --- | --- | --- | --- | --- | --- | --- | --- |
| Chongqing | 73.32 | 74.38 | 75.40 | 76.37 | 77.31 | 78.21 | 79.08 | 79.91 | 80.71 | 81.48 | 82.21 | 82.92 |
| Kunming | 81.84 | 82.77 | 83.65 | 84.48 | 85.27 | 86.02 | 86.74 | 87.41 | 88.06 | 88.66 | 89.24 | 89.79 |
| Qujing | 54.67 | 55.75 | 56.79 | 57.81 | 58.81 | 59.78 | 60.73 | 61.66 | 62.57 | 63.45 | 64.32 | 65.16 |
| Yuxi | 59.08 | 60.23 | 61.36 | 62.45 | 63.50 | 64.53 | 65.53 | 66.51 | 67.45 | 68.37 | 69.26 | 70.13 |
| Baoshan | 41.47 | 42.47 | 43.45 | 44.42 | 45.37 | 46.30 | 47.22 | 48.12 | 49.01 | 49.88 | 50.74 | 51.58 |
| Zhaotong | 43.94 | 45.30 | 46.63 | 47.92 | 49.19 | 50.42 | 51.62 | 52.80 | 53.94 | 55.06 | 56.15 | 57.21 |
| Lijiang | 51.07 | 52.43 | 53.76 | 55.06 | 56.31 | 57.53 | 58.72 | 59.87 | 61.00 | 62.09 | 63.15 | 64.18 |
| Pu'er | 45.71 | 46.37 | 47.02 | 47.65 | 48.27 | 48.88 | 49.47 | 50.04 | 50.61 | 51.16 | 51.69 | 52.22 |
| Lincang | 43.31 | 44.02 | 44.73 | 45.41 | 46.08 | 46.73 | 47.37 | 47.99 | 48.59 | 49.19 | 49.76 | 50.33 |
| Guiyang | 81.50 | 82.20 | 82.87 | 83.52 | 84.14 | 84.74 | 85.31 | 85.87 | 86.40 | 86.91 | 87.41 | 87.88 |
| Liupanshui | 52.90 | 54.17 | 55.38 | 56.53 | 57.61 | 58.65 | 59.63 | 60.57 | 61.47 | 62.33 | 63.15 | 63.93 |
| Zunyi | 63.03 | 64.50 | 65.91 | 67.26 | 68.56 | 69.80 | 71.00 | 72.15 | 73.26 | 74.32 | 75.34 | 76.31 |
| Anshun | 61.01 | 63.12 | 65.12 | 67.02 | 68.81 | 70.50 | 72.10 | 73.62 | 75.05 | 76.40 | 77.69 | 78.90 |
| Chengdu | 80.56 | 81.37 | 82.14 | 82.87 | 83.58 | 84.26 | 84.91 | 85.53 | 86.13 | 86.70 | 87.25 | 87.78 |
| Zigong | 59.37 | 60.42 | 61.44 | 62.43 | 63.40 | 64.35 | 65.27 | 66.17 | 67.04 | 67.89 | 68.72 | 69.53 |
| Panzhihua | 71.31 | 71.95 | 72.57 | 73.18 | 73.77 | 74.36 | 74.93 | 75.48 | 76.03 | 76.56 | 77.08 | 77.59 |
| Luzhou | 55.53 | 56.49 | 57.42 | 58.34 | 59.23 | 60.11 | 60.96 | 61.80 | 62.62 | 63.43 | 64.21 | 64.98 |
| Deyang | 59.80 | 60.86 | 61.89 | 62.89 | 63.87 | 64.82 | 65.74 | 66.64 | 67.52 | 68.38 | 69.21 | 70.02 |
| Mianyang | 57.77 | 58.75 | 59.72 | 60.66 | 61.58 | 62.48 | 63.35 | 64.21 | 65.05 | 65.86 | 66.66 | 67.44 |
| Guangyuan | 52.13 | 53.23 | 54.31 | 55.36 | 56.39 | 57.39 | 58.37 | 59.33 | 60.26 | 61.18 | 62.07 | 62.94 |
| Suining | 60.22 | 61.46 | 62.67 | 63.84 | 64.97 | 66.07 | 67.13 | 68.16 | 69.15 | 70.12 | 71.06 | 71.96 |
| Neijiang | 54.35 | 55.24 | 56.12 | 56.97 | 57.81 | 58.64 | 59.44 | 60.24 | 61.01 | 61.77 | 62.52 | 63.25 |
| Leshan | 57.96 | 58.99 | 60.00 | 60.98 | 61.94 | 62.88 | 63.79 | 64.69 | 65.55 | 66.40 | 67.23 | 68.03 |
| Nanchong | 54.93 | 56.02 | 57.08 | 58.11 | 59.12 | 60.11 | 61.07 | 62.01 | 62.92 | 63.82 | 64.69 | 65.54 |
| Meishan | 54.39 | 55.57 | 56.72 | 57.83 | 58.92 | 59.98 | 61.01 | 62.01 | 62.99 | 63.95 | 64.88 | 65.78 |
| Yibin | 56.55 | 57.65 | 58.72 | 59.76 | 60.78 | 61.77 | 62.73 | 63.67 | 64.59 | 65.49 | 66.36 | 67.21 |
| Guang'an | 49.33 | 50.51 | 51.66 | 52.79 | 53.88 | 54.96 | 56.01 | 57.03 | 58.03 | 59.01 | 59.96 | 60.89 |
| Dazhou | 61.35 | 62.51 | 63.61 | 64.65 | 65.63 | 66.56 | 67.44 | 68.27 | 69.06 | 69.81 | 70.53 | 71.22 |
| ya'an | 56.15 | 57.38 | 58.57 | 59.72 | 60.85 | 61.94 | 63.01 | 64.04 | 65.04 | 66.02 | 66.97 | 67.89 |
| Bazhong | 50.29 | 51.50 | 52.68 | 53.83 | 54.95 | 56.04 | 57.11 | 58.15 | 59.17 | 60.16 | 61.13 | 62.08 |
| Ziyang | 46.65 | 47.47 | 48.28 | 49.08 | 49.87 | 50.64 | 51.40 | 52.15 | 52.89 | 53.62 | 54.33 | 55.04 |

**Table E.9** High urbanization rate scenario in upstream areas (%)

|  | 2024 | 2025 | 2026 | 2027 | 2028 | 2029 | 2030 | 2031 | 2032 | 2033 | 2034 | 2035 |
| --- | --- | --- | --- | --- | --- | --- | --- | --- | --- | --- | --- | --- |
| Chongqing | 74.09 | 75.24 | 76.36 | 77.43 | 78.45 | 79.44 | 80.39 | 81.31 | 82.18 | 83.03 | 83.84 | 84.61 |
| Kunming | 82.66 | 83.67 | 84.63 | 85.54 | 86.41 | 87.23 | 88.01 | 88.75 | 89.45 | 90.12 | 90.76 | 91.36 |
| Qujing | 55.29 | 56.46 | 57.61 | 58.73 | 59.82 | 60.89 | 61.94 | 62.96 | 63.96 | 64.93 | 65.89 | 66.82 |
| Yuxi | 59.75 | 61.01 | 62.24 | 63.43 | 64.59 | 65.72 | 66.82 | 67.89 | 68.94 | 69.95 | 70.93 | 71.89 |
| Baoshan | 41.97 | 43.06 | 44.14 | 45.20 | 46.24 | 47.27 | 48.28 | 49.28 | 50.26 | 51.22 | 52.17 | 53.11 |
| Zhaotong | 44.53 | 46.01 | 47.47 | 48.89 | 50.29 | 51.65 | 52.98 | 54.28 | 55.55 | 56.79 | 58.01 | 59.19 |
| Lijiang | 51.71 | 53.20 | 54.66 | 56.08 | 57.46 | 58.81 | 60.12 | 61.39 | 62.64 | 63.85 | 65.02 | 66.17 |
| Pu'er | 46.19 | 46.91 | 47.62 | 48.31 | 48.99 | 49.65 | 50.30 | 50.93 | 51.55 | 52.16 | 52.75 | 53.33 |
| Lincang | 43.77 | 44.56 | 45.33 | 46.08 | 46.81 | 47.52 | 48.22 | 48.90 | 49.57 | 50.22 | 50.86 | 51.49 |
| Guiyang | 82.28 | 83.04 | 83.77 | 84.47 | 85.15 | 85.81 | 86.43 | 87.04 | 87.62 | 88.19 | 88.73 | 89.25 |
| Liupanshui | 53.55 | 54.94 | 56.26 | 57.52 | 58.72 | 59.86 | 60.94 | 61.98 | 62.97 | 63.92 | 64.83 | 65.70 |
| Zunyi | 63.79 | 65.39 | 66.94 | 68.42 | 69.85 | 71.22 | 72.54 | 73.81 | 75.03 | 76.20 | 77.33 | 78.41 |
| Anshun | 61.87 | 64.19 | 66.39 | 68.47 | 70.45 | 72.32 | 74.10 | 75.78 | 77.37 | 78.88 | 80.31 | 81.66 |
| Chengdu | 81.35 | 82.22 | 83.06 | 83.87 | 84.64 | 85.38 | 86.09 | 86.78 | 87.43 | 88.06 | 88.66 | 89.24 |
| Zigong | 60.02 | 61.17 | 62.28 | 63.37 | 64.44 | 65.47 | 66.48 | 67.47 | 68.43 | 69.37 | 70.29 | 71.18 |
| Panzhihua | 71.99 | 72.68 | 73.36 | 74.03 | 74.68 | 75.31 | 75.94 | 76.55 | 77.14 | 77.73 | 78.30 | 78.86 |
| Luzhou | 56.14 | 57.18 | 58.20 | 59.20 | 60.18 | 61.14 | 62.09 | 63.01 | 63.91 | 64.80 | 65.66 | 66.51 |
| Deyang | 60.46 | 61.62 | 62.74 | 63.84 | 64.91 | 65.95 | 66.97 | 67.96 | 68.92 | 69.87 | 70.78 | 71.68 |
| Mianyang | 58.40 | 59.47 | 60.53 | 61.56 | 62.57 | 63.55 | 64.51 | 65.46 | 66.38 | 67.28 | 68.16 | 69.02 |
| Guangyuan | 52.74 | 53.94 | 55.12 | 56.27 | 57.40 | 58.50 | 59.58 | 60.63 | 61.67 | 62.68 | 63.66 | 64.63 |
| Suining | 60.91 | 62.27 | 63.59 | 64.87 | 66.12 | 67.32 | 68.49 | 69.62 | 70.72 | 71.79 | 72.83 | 73.83 |
| Neijiang | 54.93 | 55.91 | 56.86 | 57.80 | 58.72 | 59.62 | 60.51 | 61.38 | 62.24 | 63.07 | 63.90 | 64.71 |
| Leshan | 58.59 | 59.72 | 60.83 | 61.91 | 62.96 | 63.99 | 64.99 | 65.97 | 66.93 | 67.86 | 68.77 | 69.67 |
| Nanchong | 55.55 | 56.74 | 57.90 | 59.03 | 60.14 | 61.22 | 62.28 | 63.32 | 64.33 | 65.31 | 66.28 | 67.22 |
| Meishan | 55.03 | 56.31 | 57.57 | 58.79 | 59.98 | 61.15 | 62.28 | 63.39 | 64.47 | 65.53 | 66.56 | 67.56 |
| Yibin | 57.19 | 58.39 | 59.56 | 60.70 | 61.82 | 62.90 | 63.97 | 65.00 | 66.01 | 67.00 | 67.96 | 68.90 |
| Guang'an | 49.92 | 51.21 | 52.47 | 53.71 | 54.92 | 56.10 | 57.25 | 58.38 | 59.49 | 60.57 | 61.63 | 62.66 |
| Dazhou | 62.05 | 63.32 | 64.53 | 65.66 | 66.74 | 67.75 | 68.72 | 69.64 | 70.51 | 71.34 | 72.13 | 72.89 |
| ya'an | 56.81 | 58.15 | 59.45 | 60.72 | 61.95 | 63.16 | 64.33 | 65.47 | 66.57 | 67.65 | 68.70 | 69.73 |
| Bazhong | 50.90 | 52.22 | 53.51 | 54.77 | 56.00 | 57.21 | 58.39 | 59.54 | 60.66 | 61.76 | 62.83 | 63.88 |
| Ziyang | 47.16 | 48.06 | 48.94 | 49.82 | 50.68 | 51.53 | 52.37 | 53.19 | 54.00 | 54.81 | 55.60 | 56.37 |

# Appendix F Scenario settings for the midstream region

Table F.1 Scenario setting of low value added of the secondary industry in the midstream region

|  | 2024 | 2025 | 2026 | 2027 | 2028 | 2029 | 2030 | 2031 | 2032 | 2033 | 2034 | 2035 |
| --- | --- | --- | --- | --- | --- | --- | --- | --- | --- | --- | --- | --- |
| Nanchang | 2690 | 2835 | 2989 | 3151 | 3321 | 3501 | 3690 | 3890 | 4100 | 4322 | 4556 | 4802 |
| Ganzhou | 1431 | 1541 | 1660 | 1788 | 1926 | 2075 | 2235 | 2408 | 2593 | 2794 | 3009 | 3242 |
| Jiujiang | 1560 | 1672 | 1792 | 1921 | 2059 | 2207 | 2365 | 2535 | 2718 | 2913 | 3122 | 3347 |
| Jingdezhen | 386 | 395 | 404 | 413 | 422 | 431 | 440 | 449 | 458 | 467 | 476 | 484 |
| Pingxiang | 416 | 423 | 430 | 437 | 445 | 452 | 459 | 466 | 473 | 480 | 487 | 494 |
| Xinyu | 439 | 446 | 453 | 460 | 467 | 474 | 481 | 487 | 494 | 501 | 508 | 515 |
| Yingtan | 499 | 528 | 559 | 591 | 626 | 662 | 701 | 742 | 785 | 831 | 879 | 931 |
| Yichun | 1103 | 1168 | 1237 | 1310 | 1387 | 1469 | 1555 | 1647 | 1744 | 1847 | 1956 | 2071 |
| Shangrao | 1011 | 1067 | 1125 | 1186 | 1251 | 1319 | 1391 | 1467 | 1547 | 1631 | 1720 | 1814 |
| Ji'an | 974 | 1044 | 1118 | 1197 | 1282 | 1373 | 1471 | 1575 | 1687 | 1807 | 1936 | 2073 |
| Fuzhou | 564 | 582 | 600 | 618 | 636 | 654 | 672 | 689 | 707 | 725 | 743 | 760 |
| Changsha | 4617 | 4773 | 4930 | 5085 | 5240 | 5395 | 5549 | 5703 | 5857 | 6010 | 6162 | 6315 |
| Zhuzhou | 1306 | 1347 | 1388 | 1429 | 1470 | 1510 | 1551 | 1591 | 1632 | 1672 | 1712 | 1752 |
| Xiangtan | 1137 | 1199 | 1264 | 1333 | 1405 | 1482 | 1562 | 1647 | 1737 | 1831 | 1931 | 2036 |
| Hengyang | 1095 | 1128 | 1160 | 1192 | 1225 | 1257 | 1289 | 1321 | 1353 | 1385 | 1417 | 1448 |
| Shaoyang | 683 | 726 | 771 | 820 | 871 | 926 | 984 | 1046 | 1112 | 1182 | 1256 | 1335 |
| Yueyang | 1478 | 1525 | 1571 | 1617 | 1663 | 1709 | 1755 | 1801 | 1846 | 1892 | 1937 | 1982 |
| Changde | 1377 | 1426 | 1475 | 1523 | 1571 | 1620 | 1668 | 1716 | 1763 | 1811 | 1858 | 1906 |
| Zhangjiajie | 84 | 86 | 88 | 90 | 91 | 93 | 95 | 97 | 98 | 100 | 102 | 104 |
| Yiyang | 807 | 862 | 922 | 985 | 1053 | 1126 | 1203 | 1286 | 1375 | 1470 | 1571 | 1680 |
| Chenzhou | 983 | 1011 | 1039 | 1066 | 1094 | 1122 | 1149 | 1177 | 1204 | 1231 | 1259 | 1286 |
| Yongzhou | 659 | 697 | 738 | 781 | 827 | 876 | 927 | 981 | 1039 | 1100 | 1164 | 1232 |
| Huaihua | 468 | 480 | 493 | 506 | 519 | 531 | 544 | 557 | 569 | 582 | 594 | 607 |
| Loudi | 633 | 651 | 670 | 688 | 706 | 724 | 743 | 761 | 779 | 797 | 815 | 833 |
| Wuhan | 5536 | 5736 | 5934 | 6132 | 6329 | 6526 | 6722 | 6917 | 7112 | 7306 | 7500 | 7694 |
| Yellowstone | 774 | 798 | 823 | 847 | 872 | 896 | 921 | 945 | 969 | 993 | 1017 | 1041 |
| Shiyan | 758 | 786 | 814 | 842 | 870 | 898 | 926 | 954 | 981 | 1009 | 1036 | 1064 |
| Yichang | 1967 | 2036 | 2105 | 2174 | 2242 | 2311 | 2379 | 2446 | 2514 | 2581 | 2649 | 2716 |
| Xiangyang | 2181 | 2270 | 2359 | 2447 | 2535 | 2623 | 2710 | 2797 | 2884 | 2971 | 3057 | 3143 |
| Ezhou | 459 | 475 | 491 | 508 | 524 | 540 | 555 | 571 | 587 | 603 | 619 | 634 |
| Jingmen | 852 | 885 | 918 | 951 | 984 | 1016 | 1049 | 1081 | 1114 | 1146 | 1178 | 1211 |
| Xiaogan | 926 | 984 | 1046 | 1111 | 1180 | 1254 | 1332 | 1415 | 1504 | 1598 | 1697 | 1803 |
| Jingzhou | 822 | 855 | 887 | 919 | 952 | 984 | 1016 | 1048 | 1079 | 1111 | 1143 | 1174 |
| Huanggang | 744 | 772 | 801 | 830 | 859 | 887 | 916 | 944 | 972 | 1001 | 1029 | 1057 |
| Xianning | 680 | 726 | 776 | 828 | 885 | 945 | 1009 | 1077 | 1150 | 1228 | 1311 | 1400 |
| Suizhou | 498 | 530 | 563 | 599 | 637 | 678 | 721 | 767 | 816 | 867 | 923 | 981 |

**Table F.2** Scenario of secondary industry value added in the midstream region

|  | 2024 | 2025 | 2026 | 2027 | 2028 | 2029 | 2030 | 2031 | 2032 | 2033 | 2034 | 2035 |
| --- | --- | --- | --- | --- | --- | --- | --- | --- | --- | --- | --- | --- |
| Nanchang | 2739 | 2902 | 3075 | 3257 | 3451 | 3656 | 3874 | 4104 | 4348 | 4606 | 4880 | 5170 |
| Ganzhou | 1463 | 1587 | 1722 | 1868 | 2026 | 2198 | 2384 | 2586 | 2806 | 3044 | 3302 | 3582 |
| Jiujiang | 1593 | 1719 | 1855 | 2001 | 2159 | 2330 | 2514 | 2713 | 2927 | 3158 | 3407 | 3676 |
| Jingdezhen | 391 | 401 | 411 | 421 | 431 | 441 | 451 | 461 | 471 | 482 | 492 | 502 |
| Pingxiang | 421 | 429 | 437 | 445 | 453 | 461 | 469 | 477 | 485 | 493 | 501 | 509 |
| Xinyu | 444 | 452 | 459 | 467 | 475 | 483 | 490 | 498 | 506 | 514 | 521 | 529 |
| Yingtan | 508 | 541 | 576 | 613 | 652 | 694 | 738 | 785 | 836 | 889 | 946 | 1007 |
| Yichun | 1124 | 1197 | 1275 | 1357 | 1445 | 1539 | 1638 | 1745 | 1857 | 1978 | 2106 | 2242 |
| Shangrao | 1030 | 1092 | 1157 | 1227 | 1300 | 1378 | 1461 | 1548 | 1641 | 1739 | 1844 | 1954 |
| Ji'an | 995 | 1073 | 1157 | 1247 | 1344 | 1449 | 1562 | 1684 | 1816 | 1958 | 2110 | 2275 |
| Fuzhou | 572 | 592 | 613 | 633 | 653 | 673 | 693 | 713 | 734 | 754 | 774 | 794 |
| Changsha | 4686 | 4861 | 5035 | 5210 | 5385 | 5560 | 5734 | 5909 | 6084 | 6258 | 6433 | 6608 |
| Zhuzhou | 1325 | 1371 | 1416 | 1462 | 1508 | 1554 | 1600 | 1646 | 1692 | 1737 | 1783 | 1829 |
| Xiangtan | 1158 | 1227 | 1300 | 1378 | 1460 | 1548 | 1640 | 1738 | 1842 | 1952 | 2069 | 2192 |
| Hengyang | 1110 | 1147 | 1183 | 1219 | 1255 | 1292 | 1328 | 1364 | 1401 | 1437 | 1473 | 1509 |
| Shaoyang | 696 | 744 | 796 | 851 | 910 | 973 | 1040 | 1112 | 1188 | 1271 | 1358 | 1452 |
| Yueyang | 1500 | 1552 | 1603 | 1655 | 1707 | 1759 | 1810 | 1862 | 1914 | 1966 | 2017 | 2069 |
| Changde | 1398 | 1453 | 1507 | 1562 | 1616 | 1670 | 1725 | 1779 | 1834 | 1888 | 1943 | 1997 |
| Zhangjiajie | 85 | 87 | 89 | 91 | 93 | 95 | 97 | 99 | 101 | 103 | 105 | 107 |
| Yiyang | 824 | 886 | 953 | 1025 | 1103 | 1187 | 1276 | 1373 | 1477 | 1589 | 1709 | 1839 |
| Chenzhou | 996 | 1028 | 1059 | 1090 | 1121 | 1152 | 1183 | 1214 | 1245 | 1276 | 1307 | 1338 |
| Yongzhou | 671 | 714 | 760 | 809 | 862 | 917 | 976 | 1039 | 1106 | 1177 | 1253 | 1334 |
| Huaihua | 474 | 488 | 503 | 517 | 531 | 545 | 560 | 574 | 588 | 602 | 617 | 631 |
| Loudi | 642 | 662 | 683 | 703 | 724 | 744 | 765 | 785 | 806 | 826 | 847 | 867 |
| Wuhan | 5622 | 5844 | 6066 | 6288 | 6511 | 6733 | 6955 | 7177 | 7400 | 7622 | 7844 | 8066 |
| Yellowstone | 785 | 812 | 840 | 867 | 895 | 923 | 950 | 978 | 1005 | 1033 | 1060 | 1088 |
| Shiyan | 770 | 801 | 833 | 864 | 896 | 927 | 959 | 990 | 1022 | 1053 | 1085 | 1116 |
| Yichang | 1997 | 2074 | 2152 | 2229 | 2306 | 2383 | 2460 | 2537 | 2614 | 2691 | 2768 | 2845 |
| Xiangyang | 2217 | 2316 | 2416 | 2515 | 2614 | 2714 | 2813 | 2913 | 3012 | 3112 | 3211 | 3310 |
| Ezhou | 466 | 484 | 502 | 520 | 538 | 556 | 574 | 592 | 611 | 629 | 647 | 665 |
| Jingmen | 865 | 902 | 939 | 976 | 1014 | 1051 | 1088 | 1125 | 1162 | 1199 | 1236 | 1273 |
| Xiaogan | 945 | 1010 | 1079 | 1153 | 1232 | 1316 | 1407 | 1503 | 1606 | 1717 | 1834 | 1960 |
| Jingzhou | 836 | 872 | 908 | 945 | 981 | 1017 | 1054 | 1090 | 1126 | 1163 | 1199 | 1235 |
| Huanggang | 755 | 788 | 820 | 852 | 885 | 917 | 949 | 982 | 1014 | 1046 | 1079 | 1111 |
| Xianning | 694 | 746 | 802 | 862 | 926 | 995 | 1069 | 1149 | 1234 | 1326 | 1425 | 1531 |
| Suizhou | 508 | 544 | 582 | 622 | 666 | 712 | 762 | 815 | 872 | 933 | 998 | 1068 |

**Table F.3** High value added scenario of the secondary industry in the midstream region

|  | 2024 | 2025 | 2026 | 2027 | 2028 | 2029 | 2030 | 2031 | 2032 | 2033 | 2034 | 2035 |
| --- | --- | --- | --- | --- | --- | --- | --- | --- | --- | --- | --- | --- |
| Nanchang | 2789 | 2970 | 3162 | 3367 | 3585 | 3818 | 4065 | 4329 | 4609 | 4908 | 5226 | 5564 |
| Ganzhou | 1495 | 1634 | 1785 | 1950 | 2130 | 2327 | 2542 | 2777 | 3034 | 3314 | 3620 | 3955 |
| Jiujiang | 1627 | 1767 | 1920 | 2085 | 2264 | 2459 | 2671 | 2901 | 3150 | 3422 | 3716 | 4036 |
| Jingdezhen | 396 | 407 | 418 | 429 | 440 | 452 | 463 | 474 | 485 | 497 | 508 | 520 |
| Pingxiang | 425 | 434 | 443 | 452 | 461 | 470 | 479 | 488 | 497 | 506 | 514 | 523 |
| Xinyu | 449 | 457 | 466 | 474 | 483 | 492 | 500 | 509 | 517 | 526 | 535 | 543 |
| Yingtan | 518 | 554 | 593 | 634 | 679 | 726 | 777 | 831 | 889 | 951 | 1018 | 1089 |
| Yichun | 1146 | 1227 | 1313 | 1406 | 1505 | 1611 | 1725 | 1847 | 1977 | 2117 | 2266 | 2426 |
| Shangrao | 1049 | 1117 | 1190 | 1268 | 1351 | 1439 | 1533 | 1634 | 1740 | 1854 | 1975 | 2104 |
| Ji'an | 1016 | 1103 | 1197 | 1298 | 1409 | 1529 | 1659 | 1800 | 1953 | 2119 | 2300 | 2496 |
| Fuzhou | 581 | 603 | 625 | 648 | 670 | 693 | 715 | 738 | 761 | 784 | 806 | 829 |
| Changsha | 4756 | 4949 | 5143 | 5338 | 5533 | 5728 | 5925 | 6121 | 6319 | 6516 | 6715 | 6913 |
| Zhuzhou | 1344 | 1394 | 1445 | 1496 | 1547 | 1599 | 1650 | 1702 | 1754 | 1805 | 1857 | 1909 |
| Xiangtan | 1179 | 1256 | 1338 | 1425 | 1518 | 1616 | 1722 | 1834 | 1953 | 2080 | 2216 | 2360 |
| Hengyang | 1126 | 1166 | 1206 | 1247 | 1287 | 1328 | 1368 | 1409 | 1450 | 1491 | 1532 | 1573 |
| Shaoyang | 710 | 764 | 821 | 883 | 949 | 1021 | 1098 | 1181 | 1269 | 1365 | 1468 | 1578 |
| Yueyang | 1521 | 1579 | 1636 | 1694 | 1751 | 1809 | 1867 | 1925 | 1984 | 2042 | 2101 | 2160 |
| Changde | 1420 | 1480 | 1540 | 1601 | 1662 | 1723 | 1784 | 1845 | 1907 | 1969 | 2030 | 2092 |
| Zhangjiajie | 86 | 89 | 91 | 93 | 95 | 97 | 100 | 102 | 104 | 106 | 108 | 111 |
| Yiyang | 841 | 910 | 985 | 1067 | 1155 | 1250 | 1353 | 1465 | 1586 | 1717 | 1859 | 2012 |
| Chenzhou | 1010 | 1045 | 1079 | 1113 | 1148 | 1183 | 1218 | 1252 | 1287 | 1322 | 1357 | 1393 |
| Yongzhou | 684 | 732 | 783 | 838 | 897 | 960 | 1028 | 1100 | 1177 | 1260 | 1348 | 1443 |
| Huaihua | 480 | 496 | 512 | 528 | 544 | 560 | 576 | 592 | 608 | 624 | 640 | 656 |
| Loudi | 651 | 673 | 696 | 719 | 742 | 765 | 788 | 811 | 834 | 857 | 880 | 903 |
| Wuhan | 5708 | 5954 | 6201 | 6448 | 6697 | 6946 | 7196 | 7446 | 7698 | 7950 | 8202 | 8456 |
| Yellowstone | 796 | 827 | 857 | 888 | 919 | 949 | 980 | 1011 | 1042 | 1073 | 1104 | 1136 |
| Shiyan | 782 | 817 | 852 | 887 | 922 | 957 | 993 | 1028 | 1064 | 1100 | 1136 | 1172 |
| Yichang | 2028 | 2113 | 2198 | 2284 | 2370 | 2457 | 2543 | 2630 | 2717 | 2805 | 2892 | 2980 |
| Xiangyang | 2253 | 2363 | 2474 | 2585 | 2696 | 2808 | 2920 | 3032 | 3145 | 3258 | 3372 | 3486 |
| Ezhou | 473 | 493 | 513 | 533 | 554 | 574 | 594 | 614 | 635 | 655 | 676 | 696 |
| Jingmen | 879 | 920 | 961 | 1003 | 1044 | 1086 | 1127 | 1169 | 1211 | 1253 | 1296 | 1338 |
| Xiaogan | 963 | 1035 | 1113 | 1196 | 1285 | 1382 | 1485 | 1596 | 1715 | 1844 | 1981 | 2130 |
| Jingzhou | 849 | 889 | 930 | 970 | 1011 | 1052 | 1093 | 1134 | 1175 | 1216 | 1258 | 1299 |
| Huanggang | 768 | 803 | 839 | 875 | 911 | 948 | 984 | 1021 | 1057 | 1094 | 1131 | 1168 |
| Xianning | 709 | 766 | 829 | 896 | 969 | 1047 | 1133 | 1225 | 1324 | 1432 | 1548 | 1674 |
| Suizhou | 518 | 558 | 600 | 646 | 695 | 748 | 805 | 866 | 932 | 1003 | 1079 | 1162 |

**Table F.4** Scenario of low value added of the third industry in the midstream region

|  | 2024 | 2025 | 2026 | 2027 | 2028 | 2029 | 2030 | 2031 | 2032 | 2033 | 2034 | 2035 |
| --- | --- | --- | --- | --- | --- | --- | --- | --- | --- | --- | --- | --- |
| Nanchang | 3036 | 3312 | 3614 | 3943 | 4302 | 4694 | 5122 | 5589 | 6098 | 6654 | 7260 | 7921 |
| Ganzhou | 2118 | 2387 | 2690 | 3031 | 3415 | 3848 | 4336 | 4886 | 5505 | 6204 | 6990 | 7877 |
| Jiujiang | 1723 | 1924 | 2147 | 2397 | 2675 | 2987 | 3334 | 3721 | 4154 | 4637 | 5176 | 5778 |
| Jingdezhen | 507 | 554 | 604 | 659 | 719 | 785 | 856 | 935 | 1020 | 1113 | 1214 | 1325 |
| Pingxiang | 521 | 562 | 606 | 654 | 705 | 761 | 820 | 885 | 955 | 1030 | 1111 | 1198 |
| Xinyu | 498 | 531 | 566 | 603 | 643 | 685 | 730 | 778 | 830 | 884 | 942 | 1004 |
| Yingtan | 478 | 533 | 595 | 664 | 741 | 827 | 922 | 1029 | 1149 | 1282 | 1430 | 1596 |
| Yichun | 1719 | 1972 | 2262 | 2594 | 2976 | 3414 | 3916 | 4492 | 5153 | 5911 | 6780 | 7777 |
| Shangrao | 1560 | 1755 | 1974 | 2221 | 2498 | 2810 | 3161 | 3556 | 4000 | 4500 | 5062 | 5695 |
| Ji'an | 1168 | 1314 | 1479 | 1664 | 1872 | 2107 | 2370 | 2667 | 3001 | 3377 | 3800 | 4275 |
| Fuzhou | 889 | 993 | 1109 | 1239 | 1384 | 1545 | 1726 | 1928 | 2153 | 2404 | 2686 | 2999 |
| Changsha | 7947 | 8768 | 9673 | 10673 | 11775 | 12991 | 14333 | 15813 | 17446 | 19248 | 21236 | 23429 |
| Zhuzhou | 1599 | 1752 | 1919 | 2103 | 2304 | 2524 | 2766 | 3030 | 3320 | 3638 | 3985 | 4366 |
| Xiangtan | 1127 | 1228 | 1337 | 1457 | 1586 | 1728 | 1882 | 2050 | 2232 | 2431 | 2648 | 2884 |
| Hengyang | 2231 | 2465 | 2724 | 3010 | 3326 | 3676 | 4062 | 4488 | 4960 | 5481 | 6056 | 6692 |
| Shaoyang | 1347 | 1503 | 1677 | 1871 | 2088 | 2329 | 2599 | 2899 | 3235 | 3609 | 4027 | 4492 |
| Yueyang | 2231 | 2462 | 2716 | 2997 | 3307 | 3649 | 4027 | 4443 | 4903 | 5410 | 5969 | 6586 |
| Changde | 2016 | 2199 | 2398 | 2615 | 2852 | 3111 | 3393 | 3701 | 4036 | 4402 | 4801 | 5237 |
| Zhangjiajie | 413 | 441 | 471 | 502 | 536 | 572 | 611 | 652 | 695 | 742 | 792 | 845 |
| Yiyang | 729 | 760 | 791 | 822 | 853 | 883 | 914 | 944 | 974 | 1004 | 1034 | 1064 |
| Chenzhou | 1425 | 1565 | 1719 | 1888 | 2074 | 2277 | 2501 | 2747 | 3017 | 3313 | 3639 | 3997 |
| Yongzhou | 1145 | 1253 | 1371 | 1501 | 1642 | 1797 | 1967 | 2153 | 2356 | 2579 | 2823 | 3089 |
| Huaihua | 1025 | 1115 | 1213 | 1320 | 1436 | 1562 | 1700 | 1850 | 2013 | 2190 | 2383 | 2593 |
| Loudi | 948 | 1047 | 1157 | 1279 | 1413 | 1562 | 1726 | 1907 | 2107 | 2328 | 2573 | 2843 |
| Wuhan | 10703 | 11748 | 12896 | 14155 | 15537 | 17054 | 18720 | 20548 | 22554 | 24757 | 27174 | 29828 |
| Yellowstone | 770 | 838 | 912 | 992 | 1079 | 1174 | 1277 | 1390 | 1512 | 1645 | 1789 | 1947 |
| Shiyan | 1060 | 1172 | 1296 | 1433 | 1584 | 1752 | 1937 | 2141 | 2368 | 2618 | 2894 | 3200 |
| Yichang | 2332 | 2600 | 2899 | 3232 | 3603 | 4017 | 4478 | 4993 | 5566 | 6206 | 6918 | 7713 |
| Xiangyang | 2367 | 2632 | 2928 | 3256 | 3621 | 4027 | 4478 | 4981 | 5539 | 6160 | 6851 | 7619 |
| Ezhou | 565 | 633 | 709 | 794 | 890 | 996 | 1116 | 1250 | 1400 | 1568 | 1757 | 1967 |
| Jingmen | 908 | 998 | 1098 | 1207 | 1327 | 1459 | 1605 | 1764 | 1940 | 2134 | 2346 | 2580 |
| Xiaogan | 1090 | 1210 | 1344 | 1493 | 1658 | 1841 | 2045 | 2271 | 2523 | 2802 | 3112 | 3456 |
| Jingzhou | 1255 | 1401 | 1565 | 1747 | 1950 | 2177 | 2431 | 2714 | 3030 | 3383 | 3777 | 4216 |
| Huanggang | 1153 | 1269 | 1397 | 1538 | 1693 | 1864 | 2052 | 2259 | 2487 | 2738 | 3014 | 3318 |
| Xianning | 775 | 860 | 955 | 1060 | 1177 | 1307 | 1451 | 1612 | 1789 | 1987 | 2206 | 2449 |
| Suizhou | 494 | 539 | 588 | 642 | 700 | 764 | 834 | 910 | 994 | 1084 | 1183 | 1292 |

**Table F.5** Scenario of value added of the third industry in the midstream region

|  | 2024 | 2025 | 2026 | 2027 | 2028 | 2029 | 2030 | 2031 | 2032 | 2033 | 2034 | 2035 |
| --- | --- | --- | --- | --- | --- | --- | --- | --- | --- | --- | --- | --- |
| Nanchang | 3111 | 3422 | 3765 | 4142 | 4557 | 5013 | 5515 | 6067 | 6674 | 7342 | 8078 | 8886 |
| Ganzhou | 2183 | 2487 | 2834 | 3229 | 3679 | 4192 | 4776 | 5441 | 6199 | 7063 | 8048 | 9169 |
| Jiujiang | 1773 | 2000 | 2255 | 2543 | 2868 | 3235 | 3648 | 4114 | 4639 | 5232 | 5901 | 6655 |
| Jingdezhen | 520 | 572 | 629 | 692 | 762 | 838 | 922 | 1015 | 1116 | 1228 | 1351 | 1486 |
| Pingxiang | 533 | 579 | 629 | 683 | 742 | 806 | 876 | 952 | 1034 | 1123 | 1220 | 1326 |
| Xinyu | 509 | 545 | 585 | 627 | 672 | 721 | 773 | 829 | 889 | 953 | 1022 | 1096 |
| Yingtan | 491 | 554 | 625 | 704 | 794 | 895 | 1009 | 1137 | 1282 | 1446 | 1630 | 1837 |
| Yichun | 1777 | 2064 | 2398 | 2785 | 3236 | 3759 | 4366 | 5072 | 5892 | 6844 | 7951 | 9236 |
| Shangrao | 1607 | 1828 | 2079 | 2364 | 2689 | 3058 | 3478 | 3955 | 4498 | 5115 | 5818 | 6616 |
| Ji'an | 1203 | 1369 | 1557 | 1772 | 2015 | 2293 | 2608 | 2967 | 3375 | 3840 | 4368 | 4969 |
| Fuzhou | 915 | 1033 | 1165 | 1315 | 1484 | 1674 | 1889 | 2132 | 2406 | 2715 | 3063 | 3457 |
| Changsha | 8160 | 9086 | 10118 | 11266 | 12545 | 13968 | 15554 | 17319 | 19284 | 21473 | 23910 | 26624 |
| Zhuzhou | 1640 | 1812 | 2003 | 2213 | 2446 | 2703 | 2987 | 3300 | 3647 | 4030 | 4454 | 4922 |
| Xiangtan | 1155 | 1268 | 1392 | 1529 | 1678 | 1843 | 2023 | 2222 | 2439 | 2678 | 2941 | 3229 |
| Hengyang | 2291 | 2556 | 2851 | 3180 | 3547 | 3956 | 4413 | 4922 | 5490 | 6124 | 6830 | 7619 |
| Shaoyang | 1386 | 1563 | 1761 | 1985 | 2237 | 2522 | 2843 | 3204 | 3611 | 4070 | 4588 | 5171 |
| Yueyang | 2291 | 2551 | 2841 | 3164 | 3524 | 3924 | 4370 | 4867 | 5420 | 6036 | 6722 | 7485 |
| Changde | 2066 | 2271 | 2498 | 2747 | 3020 | 3321 | 3652 | 4016 | 4416 | 4856 | 5340 | 5872 |
| Zhangjiajie | 422 | 453 | 487 | 522 | 561 | 602 | 647 | 695 | 746 | 801 | 860 | 923 |
| Yiyang | 741 | 776 | 811 | 845 | 880 | 915 | 949 | 984 | 1019 | 1053 | 1088 | 1123 |
| Chenzhou | 1462 | 1620 | 1795 | 1989 | 2204 | 2442 | 2705 | 2998 | 3321 | 3680 | 4077 | 4518 |
| Yongzhou | 1174 | 1295 | 1430 | 1578 | 1742 | 1923 | 2123 | 2343 | 2586 | 2855 | 3151 | 3478 |
| Huaihua | 1049 | 1151 | 1262 | 1385 | 1519 | 1665 | 1827 | 2003 | 2197 | 2410 | 2643 | 2899 |
| Loudi | 973 | 1086 | 1211 | 1351 | 1507 | 1681 | 1875 | 2091 | 2332 | 2602 | 2902 | 3237 |
| Wuhan | 10980 | 12159 | 13463 | 14908 | 16508 | 18279 | 20241 | 22413 | 24818 | 27481 | 30430 | 33695 |
| Yellowstone | 789 | 865 | 949 | 1040 | 1141 | 1251 | 1372 | 1505 | 1650 | 1810 | 1985 | 2177 |
| Shiyan | 1089 | 1216 | 1357 | 1514 | 1690 | 1886 | 2105 | 2349 | 2622 | 2926 | 3266 | 3645 |
| Yichang | 2399 | 2702 | 3043 | 3427 | 3860 | 4347 | 4896 | 5514 | 6210 | 6994 | 7877 | 8871 |
| Xiangyang | 2434 | 2734 | 3071 | 3449 | 3874 | 4351 | 4888 | 5490 | 6166 | 6926 | 7779 | 8738 |
| Ezhou | 582 | 659 | 746 | 844 | 955 | 1081 | 1224 | 1386 | 1568 | 1775 | 2010 | 2275 |
| Jingmen | 931 | 1033 | 1147 | 1272 | 1411 | 1566 | 1737 | 1927 | 2138 | 2372 | 2632 | 2920 |
| Xiaogan | 1120 | 1256 | 1409 | 1580 | 1773 | 1988 | 2230 | 2501 | 2805 | 3146 | 3529 | 3958 |
| Jingzhou | 1292 | 1457 | 1643 | 1854 | 2091 | 2358 | 2660 | 3000 | 3384 | 3817 | 4306 | 4857 |
| Huanggang | 1183 | 1315 | 1460 | 1622 | 1802 | 2002 | 2223 | 2470 | 2743 | 3048 | 3385 | 3760 |
| Xianning | 796 | 893 | 1001 | 1122 | 1259 | 1411 | 1582 | 1774 | 1989 | 2230 | 2501 | 2804 |
| Suizhou | 506 | 557 | 613 | 674 | 742 | 816 | 898 | 988 | 1088 | 1197 | 1317 | 1449 |

**Table F.6** High value added scenario of the third industry in the midstream region

|  | 2024 | 2025 | 2026 | 2027 | 2028 | 2029 | 2030 | 2031 | 2032 | 2033 | 2034 | 2035 |
| --- | --- | --- | --- | --- | --- | --- | --- | --- | --- | --- | --- | --- |
| Nanchang | 3187 | 3535 | 3921 | 4349 | 4823 | 5350 | 5934 | 6581 | 7299 | 8096 | 8980 | 9960 |
| Ganzhou | 2249 | 2591 | 2985 | 3438 | 3960 | 4562 | 5255 | 6053 | 6972 | 8031 | 9251 | 10656 |
| Jiujiang | 1824 | 2078 | 2367 | 2697 | 3072 | 3500 | 3988 | 4543 | 5176 | 5897 | 6718 | 7653 |
| Jingdezhen | 533 | 591 | 655 | 727 | 806 | 895 | 992 | 1101 | 1221 | 1354 | 1502 | 1666 |
| Pingxiang | 545 | 596 | 652 | 714 | 781 | 854 | 935 | 1023 | 1119 | 1225 | 1340 | 1467 |
| Xinyu | 519 | 560 | 604 | 651 | 703 | 758 | 818 | 882 | 952 | 1027 | 1108 | 1195 |
| Yingtan | 506 | 576 | 656 | 747 | 850 | 968 | 1103 | 1256 | 1430 | 1629 | 1855 | 2113 |
| Yichun | 1836 | 2160 | 2540 | 2988 | 3514 | 4134 | 4862 | 5719 | 6726 | 7911 | 9305 | 10945 |
| Shangrao | 1656 | 1903 | 2188 | 2516 | 2892 | 3325 | 3822 | 4394 | 5051 | 5807 | 6676 | 7675 |
| Ji'an | 1240 | 1425 | 1639 | 1885 | 2168 | 2493 | 2867 | 3297 | 3791 | 4360 | 5014 | 5766 |
| Fuzhou | 941 | 1073 | 1223 | 1395 | 1590 | 1812 | 2066 | 2355 | 2685 | 3061 | 3489 | 3978 |
| Changsha | 8377 | 9413 | 10578 | 11887 | 13357 | 15009 | 16866 | 18953 | 21297 | 23932 | 26893 | 30219 |
| Zhuzhou | 1681 | 1874 | 2089 | 2328 | 2594 | 2892 | 3223 | 3592 | 4003 | 4462 | 4973 | 5543 |
| Xiangtan | 1183 | 1309 | 1449 | 1604 | 1775 | 1965 | 2174 | 2407 | 2664 | 2948 | 3263 | 3611 |
| Hengyang | 2353 | 2649 | 2982 | 3357 | 3780 | 4255 | 4790 | 5393 | 6072 | 6835 | 7695 | 8663 |
| Shaoyang | 1426 | 1623 | 1848 | 2105 | 2396 | 2728 | 3106 | 3537 | 4027 | 4585 | 5220 | 5944 |
| Yueyang | 2352 | 2643 | 2971 | 3339 | 3752 | 4217 | 4739 | 5326 | 5986 | 6728 | 7561 | 8497 |
| Changde | 2116 | 2346 | 2601 | 2883 | 3196 | 3543 | 3928 | 4355 | 4828 | 5352 | 5933 | 6578 |
| Zhangjiajie | 431 | 465 | 503 | 543 | 587 | 634 | 685 | 740 | 800 | 864 | 933 | 1008 |
| Yiyang | 754 | 792 | 831 | 870 | 908 | 947 | 987 | 1026 | 1065 | 1105 | 1144 | 1184 |
| Chenzhou | 1500 | 1676 | 1874 | 2094 | 2341 | 2616 | 2924 | 3269 | 3653 | 4084 | 4564 | 5101 |
| Yongzhou | 1203 | 1339 | 1491 | 1659 | 1847 | 2056 | 2289 | 2548 | 2836 | 3157 | 3514 | 3912 |
| Huaihua | 1075 | 1188 | 1313 | 1452 | 1605 | 1774 | 1962 | 2168 | 2397 | 2650 | 2930 | 3238 |
| Loudi | 1000 | 1125 | 1267 | 1426 | 1606 | 1808 | 2035 | 2291 | 2579 | 2904 | 3269 | 3680 |
| Wuhan | 11262 | 12579 | 14051 | 15694 | 17530 | 19580 | 21870 | 24428 | 27286 | 30477 | 34042 | 38023 |
| Yellowstone | 808 | 893 | 987 | 1091 | 1206 | 1333 | 1473 | 1629 | 1800 | 1990 | 2200 | 2432 |
| Shiyan | 1118 | 1260 | 1419 | 1599 | 1801 | 2029 | 2286 | 2575 | 2901 | 3268 | 3682 | 4148 |
| Yichang | 2467 | 2807 | 3193 | 3632 | 4132 | 4701 | 5347 | 6083 | 6920 | 7873 | 8956 | 10188 |
| Xiangyang | 2502 | 2838 | 3219 | 3652 | 4142 | 4698 | 5329 | 6045 | 6857 | 7778 | 8823 | 10008 |
| Ezhou | 599 | 685 | 784 | 896 | 1025 | 1173 | 1341 | 1534 | 1755 | 2007 | 2296 | 2626 |
| Jingmen | 956 | 1070 | 1197 | 1340 | 1500 | 1679 | 1879 | 2104 | 2355 | 2636 | 2950 | 3302 |
| Xiaogan | 1151 | 1304 | 1477 | 1672 | 1894 | 2145 | 2429 | 2751 | 3116 | 3529 | 3996 | 4526 |
| Jingzhou | 1329 | 1514 | 1725 | 1966 | 2240 | 2552 | 2908 | 3314 | 3776 | 4303 | 4903 | 5587 |
| Huanggang | 1214 | 1361 | 1525 | 1710 | 1916 | 2148 | 2407 | 2698 | 3024 | 3389 | 3799 | 4258 |
| Xianning | 818 | 927 | 1049 | 1188 | 1345 | 1522 | 1723 | 1951 | 2209 | 2501 | 2831 | 3206 |
| Suizhou | 518 | 575 | 638 | 708 | 785 | 871 | 967 | 1072 | 1190 | 1320 | 1465 | 1625 |

Table F.7 Low Scenario of Education Expenditure in the Midstream Region

|  | 2024 | 2025 | 2026 | 2027 | 2028 | 2029 | 2030 | 2031 | 2032 | 2033 | 2034 | 2035 |
| --- | --- | --- | --- | --- | --- | --- | --- | --- | --- | --- | --- | --- |
| Nanchang | 138.7 | 150.6 | 163.5 | 177.4 | 192.6 | 209.1 | 226.9 | 246.3 | 267.4 | 290.2 | 315.0 | 342.0 |
| Ganzhou | 242.8 | 268.2 | 296.1 | 327.0 | 361.1 | 398.8 | 440.4 | 486.4 | 537.1 | 593.1 | 655.0 | 723.3 |
| Jiujiang | 125.0 | 135.9 | 147.8 | 160.7 | 174.7 | 189.9 | 206.5 | 224.5 | 244.0 | 265.3 | 288.5 | 313.6 |
| Jingdezhen | 39.4 | 42.8 | 46.6 | 50.7 | 55.2 | 60.1 | 65.4 | 71.2 | 77.5 | 84.3 | 91.7 | 99.8 |
| Pingxiang | 49.8 | 54.6 | 59.9 | 65.7 | 72.1 | 79.1 | 86.7 | 95.1 | 104.4 | 114.5 | 125.6 | 137.8 |
| Xinyu | 23.0 | 23.9 | 24.8 | 25.7 | 26.6 | 27.4 | 28.3 | 29.2 | 30.1 | 30.9 | 31.8 | 32.7 |
| Yingtan | 32.6 | 35.9 | 39.5 | 43.5 | 47.9 | 52.7 | 58.1 | 63.9 | 70.4 | 77.5 | 85.3 | 93.9 |
| Yichun | 124.3 | 135.1 | 146.9 | 159.6 | 173.5 | 188.6 | 205.1 | 222.9 | 242.3 | 263.4 | 286.3 | 311.2 |
| Shangrao | 135.2 | 145.7 | 156.9 | 168.9 | 181.9 | 195.9 | 211.0 | 227.2 | 244.7 | 263.6 | 283.8 | 305.7 |
| Ji'an | 113.7 | 123.1 | 133.4 | 144.5 | 156.5 | 169.5 | 183.6 | 198.8 | 215.3 | 233.2 | 252.6 | 273.6 |
| Fuzhou | 87.9 | 95.4 | 103.5 | 112.3 | 121.9 | 132.3 | 143.6 | 155.8 | 169.1 | 183.5 | 199.2 | 216.1 |
| Changsha | 258.5 | 283.1 | 310.1 | 339.7 | 372.1 | 407.6 | 446.5 | 489.0 | 535.7 | 586.8 | 642.7 | 704.0 |
| Zhuzhou | 67.3 | 72.2 | 77.3 | 82.9 | 88.9 | 95.2 | 102.1 | 109.4 | 117.3 | 125.7 | 134.7 | 144.4 |
| Xiangtan | 36.6 | 38.0 | 39.5 | 40.9 | 42.3 | 43.8 | 45.2 | 46.6 | 48.0 | 49.4 | 50.8 | 52.2 |
| Hengyang | 93.0 | 97.0 | 101.0 | 105.0 | 109.0 | 112.9 | 116.9 | 120.8 | 124.7 | 128.6 | 132.6 | 136.4 |
| Shaoyang | 112.0 | 121.4 | 131.6 | 142.6 | 154.6 | 167.5 | 181.6 | 196.8 | 213.3 | 231.1 | 250.5 | 271.5 |
| Yueyang | 70.1 | 74.2 | 78.6 | 83.2 | 88.1 | 93.3 | 98.8 | 104.6 | 110.8 | 117.3 | 124.2 | 131.5 |
| Changde | 79.0 | 84.0 | 89.3 | 94.9 | 100.9 | 107.3 | 114.0 | 121.2 | 128.9 | 137.0 | 145.6 | 154.8 |
| Zhangjiajie | 24.7 | 25.8 | 26.8 | 27.9 | 28.9 | 30.0 | 31.0 | 32.0 | 33.1 | 34.1 | 35.1 | 36.2 |
| Yiyang | 60.6 | 64.7 | 69.0 | 73.7 | 78.7 | 84.0 | 89.7 | 95.8 | 102.2 | 109.1 | 116.5 | 124.4 |
| Chenzhou | 75.0 | 77.8 | 80.7 | 83.5 | 86.3 | 89.1 | 92.0 | 94.8 | 97.5 | 100.3 | 103.1 | 105.9 |
| Yongzhou | 97.1 | 104.4 | 112.3 | 120.8 | 129.9 | 139.8 | 150.4 | 161.7 | 174.0 | 187.1 | 201.3 | 216.5 |
| Huaihua | 92.5 | 100.2 | 108.5 | 117.5 | 127.3 | 137.9 | 149.3 | 161.7 | 175.2 | 189.7 | 205.5 | 222.5 |
| Loudi | 65.8 | 71.3 | 77.2 | 83.7 | 90.7 | 98.3 | 106.5 | 115.4 | 125.0 | 135.5 | 146.8 | 159.1 |
| Wuhan | 327.7 | 358.3 | 391.9 | 428.5 | 468.6 | 512.5 | 560.5 | 612.9 | 670.3 | 733.1 | 801.7 | 876.7 |
| Yellowstone | 46.1 | 49.6 | 53.4 | 57.5 | 61.9 | 66.7 | 71.8 | 77.3 | 83.2 | 89.5 | 96.4 | 103.8 |
| Shiyan | 52.7 | 54.9 | 57.1 | 59.3 | 61.5 | 63.7 | 65.8 | 68.0 | 70.2 | 72.3 | 74.5 | 76.6 |
| Yichang | 70.9 | 73.8 | 76.6 | 79.5 | 82.3 | 85.1 | 87.9 | 90.7 | 93.5 | 96.3 | 99.1 | 101.9 |
| Xiangyang | 90.9 | 94.8 | 98.7 | 102.5 | 106.4 | 110.2 | 114.1 | 117.9 | 121.7 | 125.5 | 129.3 | 133.1 |
| Ezhou | 22.3 | 24.1 | 26.1 | 28.2 | 30.5 | 33.0 | 35.6 | 38.5 | 41.7 | 45.1 | 48.8 | 52.7 |
| Jingmen | 33.4 | 34.8 | 36.1 | 37.4 | 38.8 | 40.1 | 41.4 | 42.7 | 44.1 | 45.4 | 46.7 | 48.0 |
| Xiaogan | 56.5 | 58.6 | 60.8 | 63.0 | 65.2 | 67.3 | 69.5 | 71.6 | 73.8 | 75.9 | 78.0 | 80.2 |
| Jingzhou | 62.4 | 64.9 | 67.5 | 70.1 | 72.6 | 75.2 | 77.7 | 80.2 | 82.8 | 85.3 | 87.8 | 90.3 |
| Huanggang | 90.5 | 94.2 | 97.8 | 101.4 | 105.0 | 108.6 | 112.1 | 115.7 | 119.3 | 122.8 | 126.3 | 129.9 |
| Xianning | 37.8 | 39.4 | 41.0 | 42.5 | 44.1 | 45.6 | 47.2 | 48.7 | 50.3 | 51.8 | 53.3 | 54.9 |
| Suizhou | 25.8 | 27.4 | 29.2 | 31.0 | 33.0 | 35.0 | 37.2 | 39.6 | 42.1 | 44.8 | 47.6 | 50.6 |

**Table F.8** Scenario of education expenditure in the midstream region

|  | 2024 | 2025 | 2026 | 2027 | 2028 | 2029 | 2030 | 2031 | 2032 | 2033 | 2034 | 2035 |
| --- | --- | --- | --- | --- | --- | --- | --- | --- | --- | --- | --- | --- |
| Nanchang | 141.8 | 155.0 | 169.4 | 185.1 | 202.3 | 221.1 | 241.6 | 264.0 | 288.6 | 315.4 | 344.7 | 376.7 |
| Ganzhou | 248.8 | 277.0 | 308.5 | 343.4 | 382.4 | 425.7 | 474.0 | 527.7 | 587.6 | 654.2 | 728.3 | 810.9 |
| Jiujiang | 127.8 | 139.9 | 153.2 | 167.7 | 183.6 | 201.0 | 220.0 | 240.9 | 263.7 | 288.7 | 316.1 | 346.0 |
| Jingdezhen | 40.2 | 44.1 | 48.3 | 53.0 | 58.1 | 63.6 | 69.7 | 76.4 | 83.8 | 91.8 | 100.6 | 110.3 |
| Pingxiang | 50.9 | 56.3 | 62.2 | 68.8 | 76.1 | 84.1 | 93.0 | 102.8 | 113.6 | 125.6 | 138.8 | 153.4 |
| Xinyu | 23.4 | 24.3 | 25.3 | 26.3 | 27.3 | 28.3 | 29.3 | 30.2 | 31.2 | 32.2 | 33.2 | 34.2 |
| Yingtan | 33.4 | 37.1 | 41.1 | 45.7 | 50.7 | 56.2 | 62.4 | 69.2 | 76.8 | 85.2 | 94.6 | 104.9 |
| Yichun | 127.0 | 139.1 | 152.2 | 166.6 | 182.4 | 199.6 | 218.5 | 239.2 | 261.8 | 286.6 | 313.7 | 343.4 |
| Shangrao | 138.0 | 149.6 | 162.1 | 175.7 | 190.3 | 206.3 | 223.5 | 242.2 | 262.5 | 284.4 | 308.2 | 334.0 |
| Ji'an | 116.1 | 126.6 | 138.1 | 150.5 | 164.1 | 179.0 | 195.1 | 212.8 | 232.0 | 253.0 | 275.8 | 300.7 |
| Fuzhou | 89.8 | 98.1 | 107.2 | 117.1 | 128.0 | 139.9 | 152.8 | 167.0 | 182.5 | 199.4 | 217.9 | 238.1 |
| Changsha | 264.5 | 291.9 | 322.2 | 355.6 | 392.5 | 433.1 | 478.0 | 527.6 | 582.3 | 642.7 | 709.3 | 782.8 |
| Zhuzhou | 68.7 | 74.0 | 79.8 | 86.0 | 92.7 | 100.0 | 107.8 | 116.2 | 125.3 | 135.0 | 145.6 | 156.9 |
| Xiangtan | 37.1 | 38.7 | 40.3 | 41.9 | 43.5 | 45.1 | 46.7 | 48.3 | 49.9 | 51.5 | 53.1 | 54.7 |
| Hengyang | 94.5 | 98.9 | 103.3 | 107.8 | 112.2 | 116.6 | 121.1 | 125.5 | 129.9 | 134.4 | 138.8 | 143.2 |
| Shaoyang | 114.5 | 124.9 | 136.2 | 148.7 | 162.2 | 177.0 | 193.1 | 210.7 | 229.9 | 250.8 | 273.7 | 298.6 |
| Yueyang | 71.3 | 75.9 | 80.8 | 85.9 | 91.4 | 97.3 | 103.5 | 110.1 | 117.2 | 124.7 | 132.7 | 141.2 |
| Changde | 80.5 | 86.0 | 91.9 | 98.2 | 104.9 | 112.1 | 119.8 | 128.0 | 136.8 | 146.1 | 156.1 | 166.9 |
| Zhangjiajie | 25.1 | 26.3 | 27.4 | 28.6 | 29.8 | 30.9 | 32.1 | 33.3 | 34.4 | 35.6 | 36.8 | 37.9 |
| Yiyang | 61.7 | 66.3 | 71.1 | 76.4 | 82.0 | 88.0 | 94.5 | 101.4 | 108.9 | 116.9 | 125.5 | 134.7 |
| Chenzhou | 76.1 | 79.2 | 82.4 | 85.5 | 88.7 | 91.8 | 95.0 | 98.1 | 101.2 | 104.4 | 107.5 | 110.7 |
| Yongzhou | 99.0 | 107.2 | 116.0 | 125.5 | 135.9 | 147.1 | 159.1 | 172.2 | 186.4 | 201.7 | 218.3 | 236.3 |
| Huaihua | 94.5 | 103.1 | 112.4 | 122.5 | 133.6 | 145.6 | 158.7 | 173.1 | 188.7 | 205.7 | 224.3 | 244.5 |
| Loudi | 67.2 | 73.3 | 79.9 | 87.2 | 95.1 | 103.8 | 113.2 | 123.5 | 134.8 | 147.0 | 160.4 | 175.0 |
| Wuhan | 335.2 | 369.3 | 406.9 | 448.3 | 493.9 | 544.2 | 599.5 | 660.5 | 727.7 | 801.8 | 883.3 | 973.2 |
| Yellowstone | 47.1 | 51.0 | 55.2 | 59.8 | 64.8 | 70.2 | 76.0 | 82.3 | 89.2 | 96.6 | 104.6 | 113.3 |
| Shiyan | 53.5 | 55.9 | 58.4 | 60.8 | 63.3 | 65.7 | 68.1 | 70.6 | 73.0 | 75.5 | 77.9 | 80.4 |
| Yichang | 72.0 | 75.1 | 78.3 | 81.5 | 84.6 | 87.8 | 90.9 | 94.1 | 97.2 | 100.4 | 103.6 | 106.7 |
| Xiangyang | 92.3 | 96.6 | 100.9 | 105.2 | 109.5 | 113.8 | 118.1 | 122.4 | 126.7 | 131.0 | 135.4 | 139.7 |
| Ezhou | 22.7 | 24.8 | 27.0 | 29.3 | 31.9 | 34.8 | 37.9 | 41.2 | 44.9 | 48.8 | 53.2 | 57.9 |
| Jingmen | 33.9 | 35.4 | 36.9 | 38.4 | 39.9 | 41.3 | 42.8 | 44.3 | 45.8 | 47.3 | 48.8 | 50.3 |
| Xiaogan | 57.3 | 59.7 | 62.1 | 64.5 | 67.0 | 69.4 | 71.8 | 74.2 | 76.6 | 79.0 | 81.4 | 83.8 |
| Jingzhou | 63.3 | 66.2 | 69.0 | 71.9 | 74.7 | 77.6 | 80.4 | 83.3 | 86.1 | 89.0 | 91.8 | 94.7 |
| Huanggang | 91.9 | 95.9 | 99.9 | 103.9 | 107.9 | 111.9 | 115.9 | 120.0 | 124.0 | 128.0 | 132.0 | 136.0 |
| Xianning | 38.4 | 40.2 | 41.9 | 43.6 | 45.4 | 47.1 | 48.8 | 50.6 | 52.3 | 54.0 | 55.8 | 57.5 |
| Suizhou | 26.3 | 28.1 | 30.0 | 32.1 | 34.3 | 36.6 | 39.1 | 41.8 | 44.7 | 47.8 | 51.0 | 54.6 |

Table F.9 High Scenario of Education Expenditure in the Midstream Region

|  | 2024 | 2025 | 2026 | 2027 | 2028 | 2029 | 2030 | 2031 | 2032 | 2033 | 2034 | 2035 |
| --- | --- | --- | --- | --- | --- | --- | --- | --- | --- | --- | --- | --- |
| Nanchang | 144.9 | 159.4 | 175.4 | 193.0 | 212.4 | 233.7 | 257.1 | 282.9 | 311.3 | 342.5 | 376.9 | 414.7 |
| Ganzhou | 254.9 | 286.1 | 321.2 | 360.5 | 404.7 | 454.2 | 509.8 | 572.2 | 642.3 | 721.0 | 809.3 | 908.3 |
| Jiujiang | 130.6 | 144.0 | 158.7 | 175.0 | 192.9 | 212.6 | 234.4 | 258.4 | 284.8 | 314.0 | 346.1 | 381.5 |
| Jingdezhen | 41.1 | 45.4 | 50.1 | 55.3 | 61.0 | 67.4 | 74.3 | 82.0 | 90.5 | 99.9 | 110.3 | 121.7 |
| Pingxiang | 52.1 | 58.1 | 64.7 | 72.0 | 80.2 | 89.4 | 99.6 | 110.9 | 123.5 | 137.6 | 153.3 | 170.7 |
| Xinyu | 23.7 | 24.8 | 25.9 | 27.0 | 28.0 | 29.1 | 30.2 | 31.3 | 32.4 | 33.5 | 34.6 | 35.7 |
| Yingtan | 34.2 | 38.3 | 42.8 | 47.9 | 53.5 | 59.9 | 67.0 | 74.9 | 83.8 | 93.7 | 104.8 | 117.2 |
| Yichun | 129.8 | 143.1 | 157.7 | 173.8 | 191.6 | 211.2 | 232.7 | 256.5 | 282.7 | 311.6 | 343.5 | 378.6 |
| Shangrao | 140.9 | 153.6 | 167.5 | 182.6 | 199.1 | 217.1 | 236.7 | 258.1 | 281.4 | 306.8 | 334.5 | 364.7 |
| Ji'an | 118.6 | 130.2 | 142.9 | 156.8 | 172.1 | 188.9 | 207.4 | 227.6 | 249.8 | 274.2 | 301.0 | 330.3 |
| Fuzhou | 91.7 | 100.9 | 111.0 | 122.1 | 134.4 | 147.8 | 162.6 | 178.9 | 196.8 | 216.5 | 238.2 | 262.0 |
| Changsha | 270.6 | 300.9 | 334.6 | 372.1 | 413.8 | 460.1 | 511.6 | 568.9 | 632.6 | 703.4 | 782.2 | 869.8 |
| Zhuzhou | 70.0 | 75.9 | 82.3 | 89.3 | 96.8 | 104.9 | 113.8 | 123.4 | 133.8 | 145.0 | 157.3 | 170.5 |
| Xiangtan | 37.7 | 39.4 | 41.2 | 43.0 | 44.7 | 46.5 | 48.3 | 50.0 | 51.8 | 53.6 | 55.4 | 57.2 |
| Hengyang | 96.0 | 100.8 | 105.7 | 110.6 | 115.5 | 120.4 | 125.4 | 130.3 | 135.3 | 140.3 | 145.3 | 150.3 |
| Shaoyang | 116.9 | 128.4 | 141.0 | 154.9 | 170.2 | 186.9 | 205.3 | 225.5 | 247.7 | 272.0 | 298.8 | 328.2 |
| Yueyang | 72.6 | 77.6 | 83.0 | 88.7 | 94.9 | 101.4 | 108.4 | 115.9 | 123.9 | 132.5 | 141.7 | 151.5 |
| Changde | 81.9 | 88.0 | 94.5 | 101.5 | 109.0 | 117.1 | 125.8 | 135.1 | 145.1 | 155.8 | 167.4 | 179.8 |
| Zhangjiajie | 25.5 | 26.8 | 28.1 | 29.4 | 30.7 | 31.9 | 33.2 | 34.6 | 35.9 | 37.2 | 38.5 | 39.8 |
| Yiyang | 62.9 | 67.9 | 73.3 | 79.1 | 85.4 | 92.2 | 99.5 | 107.4 | 115.9 | 125.1 | 135.0 | 145.8 |
| Chenzhou | 77.2 | 80.7 | 84.1 | 87.6 | 91.1 | 94.6 | 98.1 | 101.6 | 105.1 | 108.6 | 112.1 | 115.7 |
| Yongzhou | 101.0 | 110.0 | 119.8 | 130.4 | 142.0 | 154.7 | 168.4 | 183.4 | 199.6 | 217.4 | 236.7 | 257.7 |
| Huaihua | 96.5 | 106.0 | 116.3 | 127.6 | 140.1 | 153.7 | 168.7 | 185.1 | 203.2 | 223.0 | 244.7 | 268.6 |
| Loudi | 68.6 | 75.4 | 82.8 | 90.9 | 99.8 | 109.6 | 120.4 | 132.2 | 145.2 | 159.4 | 175.1 | 192.3 |
| Wuhan | 342.9 | 380.6 | 422.4 | 468.8 | 520.4 | 577.5 | 641.0 | 711.4 | 789.6 | 876.3 | 972.6 | 1079.5 |
| Yellowstone | 48.0 | 52.3 | 57.0 | 62.2 | 67.7 | 73.8 | 80.5 | 87.7 | 95.6 | 104.1 | 113.5 | 123.7 |
| Shiyan | 54.3 | 57.0 | 59.7 | 62.4 | 65.1 | 67.8 | 70.5 | 73.3 | 76.0 | 78.7 | 81.5 | 84.3 |
| Yichang | 73.1 | 76.5 | 80.0 | 83.5 | 87.0 | 90.5 | 94.0 | 97.5 | 101.1 | 104.6 | 108.2 | 111.7 |
| Xiangyang | 93.8 | 98.5 | 103.2 | 108.0 | 112.8 | 117.5 | 122.3 | 127.1 | 132.0 | 136.8 | 141.7 | 146.5 |
| Ezhou | 23.2 | 25.5 | 27.9 | 30.6 | 33.5 | 36.7 | 40.2 | 44.0 | 48.3 | 52.9 | 57.9 | 63.5 |
| Jingmen | 34.4 | 36.1 | 37.7 | 39.3 | 41.0 | 42.6 | 44.3 | 45.9 | 47.6 | 49.3 | 50.9 | 52.6 |
| Xiaogan | 58.2 | 60.8 | 63.5 | 66.1 | 68.8 | 71.5 | 74.1 | 76.8 | 79.5 | 82.2 | 84.9 | 87.7 |
| Jingzhou | 64.3 | 67.4 | 70.6 | 73.7 | 76.9 | 80.0 | 83.2 | 86.4 | 89.6 | 92.8 | 96.0 | 99.2 |
| Huanggang | 93.3 | 97.7 | 102.1 | 106.5 | 111.0 | 115.4 | 119.9 | 124.3 | 128.8 | 133.3 | 137.8 | 142.3 |
| Xianning | 39.0 | 40.9 | 42.8 | 44.7 | 46.7 | 48.6 | 50.5 | 52.5 | 54.4 | 56.4 | 58.3 | 60.3 |
| Suizhou | 26.7 | 28.7 | 30.9 | 33.2 | 35.6 | 38.3 | 41.1 | 44.1 | 47.4 | 50.9 | 54.7 | 58.8 |

# Appendix G: Scenario settings for downstream areas

Table G.1 Low scenario of added value of the secondary industry in downstream areas

|  | 2024 | 2025 | 2026 | 2027 | 2028 | 2029 | 2030 | 2031 | 2032 | 2033 | 2034 | 2035 |
| --- | --- | --- | --- | --- | --- | --- | --- | --- | --- | --- | --- | --- |
| Shanghai | 7933 | 8049 | 8166 | 8282 | 8398 | 8514 | 8630 | 8746 | 8861 | 8977 | 9092 | 9207 |
| Hangzhou | 4269 | 4405 | 4545 | 4690 | 4839 | 4993 | 5152 | 5316 | 5485 | 5659 | 5839 | 6025 |
| Ningbo | 5624 | 5920 | 6232 | 6560 | 6905 | 7269 | 7651 | 8054 | 8478 | 8925 | 9394 | 9889 |
| Wenzhou | 2420 | 2511 | 2605 | 2702 | 2803 | 2908 | 3017 | 3130 | 3248 | 3369 | 3495 | 3626 |
| Jiaxing | 2798 | 2963 | 3138 | 3323 | 3519 | 3726 | 3945 | 4178 | 4424 | 4685 | 4961 | 5253 |
| Huzhou | 1492 | 1578 | 1670 | 1766 | 1868 | 1976 | 2091 | 2212 | 2340 | 2475 | 2618 | 2770 |
| Shaoxing | 2478 | 2562 | 2650 | 2741 | 2835 | 2932 | 3032 | 3136 | 3244 | 3355 | 3470 | 3588 |
| Jinhua | 1655 | 1709 | 1765 | 1823 | 1883 | 1944 | 2008 | 2073 | 2141 | 2211 | 2284 | 2358 |
| Quzhou | 593 | 608 | 623 | 638 | 653 | 668 | 683 | 698 | 713 | 727 | 742 | 757 |
| Zhoushan | 499 | 514 | 530 | 545 | 560 | 576 | 591 | 606 | 622 | 637 | 652 | 667 |
| Taizhou | 2050 | 2136 | 2226 | 2320 | 2417 | 2519 | 2625 | 2735 | 2850 | 2970 | 3095 | 3225 |
| Lishui | 522 | 536 | 550 | 565 | 579 | 593 | 607 | 621 | 635 | 649 | 663 | 677 |
| Hefei | 3598 | 3742 | 3886 | 4029 | 4172 | 4314 | 4456 | 4597 | 4738 | 4878 | 5018 | 5158 |
| Wuhu | 1751 | 1818 | 1886 | 1953 | 2019 | 2086 | 2152 | 2218 | 2284 | 2350 | 2416 | 2481 |
| Bengbu | 731 | 760 | 789 | 817 | 846 | 874 | 903 | 931 | 959 | 987 | 1015 | 1043 |
| Huainan | 461 | 470 | 479 | 488 | 497 | 506 | 515 | 524 | 534 | 543 | 552 | 561 |
| Ma'anshan | 946 | 974 | 1002 | 1030 | 1057 | 1085 | 1113 | 1140 | 1168 | 1195 | 1223 | 1250 |
| Huaibei | 459 | 471 | 484 | 496 | 509 | 521 | 533 | 545 | 558 | 570 | 582 | 594 |
| Tongling | 528 | 543 | 557 | 571 | 586 | 600 | 614 | 628 | 643 | 657 | 671 | 685 |
| Anqing | 950 | 984 | 1017 | 1051 | 1084 | 1117 | 1150 | 1183 | 1216 | 1249 | 1281 | 1314 |
| Mount Huangshan | 260 | 269 | 278 | 287 | 296 | 304 | 313 | 322 | 331 | 339 | 348 | 357 |
| Fuyang | 1156 | 1281 | 1419 | 1571 | 1740 | 1927 | 2135 | 2364 | 2619 | 2900 | 3212 | 3558 |
| Suzhou | 732 | 785 | 843 | 905 | 971 | 1043 | 1119 | 1201 | 1289 | 1384 | 1486 | 1595 |
| Chuzhou | 1679 | 1882 | 2110 | 2366 | 2652 | 2973 | 3333 | 3736 | 4189 | 4696 | 5264 | 5902 |
| Lu'an | 562 | 581 | 600 | 619 | 638 | 657 | 676 | 695 | 713 | 732 | 751 | 769 |
| Xuancheng | 809 | 874 | 944 | 1020 | 1102 | 1190 | 1286 | 1389 | 1501 | 1622 | 1752 | 1893 |
| Chizhou | 397 | 428 | 461 | 497 | 535 | 576 | 620 | 668 | 719 | 775 | 835 | 899 |
| Bozhou | 670 | 729 | 794 | 864 | 940 | 1024 | 1114 | 1213 | 1320 | 1437 | 1564 | 1702 |
| Nanjing | 4861 | 5118 | 5389 | 5675 | 5975 | 6292 | 6625 | 6977 | 7346 | 7735 | 8145 | 8577 |
| Suzhou | 8134 | 8433 | 8743 | 9064 | 9397 | 9742 | 10100 | 10471 | 10855 | 11254 | 11668 | 12096 |
| Wuxi | 4959 | 5140 | 5328 | 5522 | 5724 | 5934 | 6150 | 6375 | 6608 | 6850 | 7100 | 7360 |
| Changzhou | 3364 | 3546 | 3737 | 3939 | 4152 | 4376 | 4613 | 4862 | 5125 | 5401 | 5693 | 6001 |
| Zhenjiang | 1833 | 1901 | 1972 | 2045 | 2121 | 2200 | 2281 | 2366 | 2454 | 2545 | 2639 | 2737 |
| Nantong | 4499 | 4799 | 5118 | 5460 | 5823 | 6211 | 6625 | 7067 | 7538 | 8040 | 8576 | 9148 |
| Yangzhou | 2712 | 2873 | 3042 | 3222 | 3412 | 3613 | 3827 | 4053 | 4292 | 4545 | 4814 | 5098 |
| Yancheng | 2318 | 2439 | 2566 | 2701 | 2842 | 2991 | 3147 | 3312 | 3485 | 3667 | 3859 | 4061 |
| Xuzhou | 2741 | 2865 | 2993 | 3128 | 3268 | 3415 | 3568 | 3728 | 3896 | 4070 | 4253 | 4444 |
| Huai'an | 1635 | 1742 | 1856 | 1978 | 2107 | 2244 | 2391 | 2548 | 2714 | 2891 | 3080 | 3282 |
| Lianyungang | 1394 | 1490 | 1593 | 1702 | 1819 | 1944 | 2078 | 2221 | 2374 | 2537 | 2712 | 2898 |
| Taizhou | 2468 | 2614 | 2769 | 2932 | 3106 | 3289 | 3484 | 3689 | 3908 | 4138 | 4383 | 4642 |
| Suqian | 1457 | 1563 | 1676 | 1798 | 1929 | 2070 | 2220 | 2382 | 2555 | 2741 | 2940 | 3154 |

**Table G.2** Scenarios for the value added of the secondary industry in downstream areas

|  | 2024 | 2025 | 2026 | 2027 | 2028 | 2029 | 2030 | 2031 | 2032 | 2033 | 2034 | 2035 |
| --- | --- | --- | --- | --- | --- | --- | --- | --- | --- | --- | --- | --- |
| Shanghai | 8020 | 8150 | 8279 | 8409 | 8539 | 8668 | 8798 | 8927 | 9057 | 9187 | 9316 | 9446 |
| Hangzhou | 4330 | 4481 | 4638 | 4800 | 4968 | 5142 | 5321 | 5507 | 5700 | 5899 | 6106 | 6319 |
| Ningbo | 5726 | 6057 | 6407 | 6778 | 7170 | 7585 | 8024 | 8488 | 8979 | 9498 | 10048 | 10629 |
| Wenzhou | 2457 | 2558 | 2663 | 2773 | 2887 | 3006 | 3130 | 3258 | 3393 | 3532 | 3678 | 3829 |
| Jiaxing | 2852 | 3037 | 3233 | 3443 | 3666 | 3903 | 4156 | 4425 | 4712 | 5017 | 5342 | 5688 |
| Huzhou | 1520 | 1617 | 1720 | 1829 | 1945 | 2069 | 2201 | 2341 | 2489 | 2648 | 2816 | 2995 |
| Shaoxing | 2514 | 2609 | 2707 | 2809 | 2914 | 3024 | 3138 | 3256 | 3378 | 3506 | 3637 | 3774 |
| Jinhua | 1679 | 1739 | 1802 | 1867 | 1934 | 2003 | 2075 | 2150 | 2227 | 2307 | 2390 | 2476 |
| Quzhou | 601 | 618 | 635 | 651 | 668 | 685 | 702 | 718 | 735 | 752 | 769 | 785 |
| Zhoushan | 506 | 523 | 540 | 558 | 575 | 592 | 610 | 627 | 644 | 661 | 679 | 696 |
| Taizhou | 2083 | 2179 | 2280 | 2385 | 2496 | 2611 | 2732 | 2858 | 2990 | 3128 | 3273 | 3424 |
| Lishui | 529 | 545 | 561 | 577 | 593 | 608 | 624 | 640 | 656 | 672 | 688 | 704 |
| Hefei | 3656 | 3818 | 3979 | 4140 | 4301 | 4462 | 4623 | 4784 | 4945 | 5107 | 5268 | 5429 |
| Wuhu | 1779 | 1854 | 1930 | 2005 | 2080 | 2156 | 2231 | 2306 | 2382 | 2457 | 2532 | 2608 |
| Bengbu | 743 | 775 | 807 | 839 | 872 | 904 | 936 | 968 | 1000 | 1033 | 1065 | 1097 |
| Huainan | 466 | 476 | 487 | 497 | 507 | 517 | 527 | 538 | 548 | 558 | 568 | 578 |
| Ma'anshan | 959 | 990 | 1022 | 1053 | 1084 | 1115 | 1147 | 1178 | 1209 | 1240 | 1272 | 1303 |
| Huaibei | 465 | 479 | 493 | 507 | 521 | 535 | 548 | 562 | 576 | 590 | 604 | 618 |
| Tongling | 535 | 551 | 568 | 584 | 600 | 616 | 632 | 648 | 664 | 680 | 696 | 712 |
| Anqing | 965 | 1002 | 1040 | 1077 | 1115 | 1152 | 1190 | 1227 | 1264 | 1302 | 1339 | 1377 |
| Mount Huangshan | 264 | 274 | 284 | 294 | 304 | 314 | 324 | 334 | 343 | 353 | 363 | 373 |
| Fuyang | 1188 | 1329 | 1486 | 1661 | 1858 | 2077 | 2323 | 2598 | 2905 | 3248 | 3632 | 4061 |
| Suzhou | 748 | 808 | 873 | 944 | 1020 | 1102 | 1191 | 1287 | 1390 | 1503 | 1624 | 1755 |
| Chuzhou | 1729 | 1959 | 2219 | 2515 | 2849 | 3228 | 3658 | 4144 | 4696 | 5321 | 6028 | 6830 |
| Lu'an | 570 | 591 | 613 | 634 | 656 | 677 | 698 | 720 | 741 | 763 | 784 | 805 |
| Xuancheng | 827 | 901 | 980 | 1067 | 1161 | 1263 | 1375 | 1496 | 1628 | 1772 | 1929 | 2099 |
| Chizhou | 406 | 441 | 478 | 518 | 562 | 610 | 662 | 718 | 778 | 844 | 916 | 993 |
| Bozhou | 686 | 753 | 826 | 907 | 995 | 1091 | 1197 | 1314 | 1442 | 1582 | 1735 | 1904 |
| Nanjing | 4949 | 5237 | 5542 | 5864 | 6206 | 6567 | 6950 | 7354 | 7782 | 8236 | 8715 | 9222 |
| Suzhou | 8257 | 8591 | 8937 | 9298 | 9674 | 10064 | 10470 | 10893 | 11333 | 11790 | 12266 | 12761 |
| Wuxi | 5034 | 5236 | 5446 | 5665 | 5892 | 6129 | 6375 | 6631 | 6898 | 7175 | 7463 | 7763 |
| Changzhou | 3426 | 3629 | 3844 | 4073 | 4314 | 4571 | 4842 | 5129 | 5434 | 5756 | 6098 | 6460 |
| Zhenjiang | 1861 | 1937 | 2016 | 2098 | 2184 | 2273 | 2366 | 2462 | 2562 | 2667 | 2776 | 2889 |
| Nantong | 4591 | 4928 | 5288 | 5676 | 6091 | 6538 | 7016 | 7530 | 8082 | 8673 | 9309 | 9990 |
| Yangzhou | 2765 | 2944 | 3135 | 3338 | 3555 | 3785 | 4031 | 4293 | 4571 | 4868 | 5183 | 5520 |
| Yancheng | 2359 | 2495 | 2638 | 2790 | 2950 | 3120 | 3299 | 3489 | 3689 | 3901 | 4126 | 4363 |
| Xuzhou | 2787 | 2925 | 3069 | 3220 | 3379 | 3546 | 3721 | 3904 | 4097 | 4299 | 4511 | 4734 |
| Huai'an | 1669 | 1788 | 1917 | 2055 | 2202 | 2360 | 2530 | 2712 | 2907 | 3115 | 3339 | 3579 |
| Lianyungang | 1423 | 1531 | 1647 | 1771 | 1905 | 2049 | 2204 | 2371 | 2550 | 2743 | 2950 | 3173 |
| Taizhou | 2516 | 2679 | 2853 | 3038 | 3236 | 3446 | 3670 | 3908 | 4162 | 4432 | 4720 | 5027 |
| Suqian | 1488 | 1607 | 1736 | 1875 | 2024 | 2186 | 2361 | 2550 | 2754 | 2974 | 3211 | 3468 |

**Table G.3** High value added scenario of the secondary industry in downstream areas

|  | 2024 | 2025 | 2026 | 2027 | 2028 | 2029 | 2030 | 2031 | 2032 | 2033 | 2034 | 2035 |
| --- | --- | --- | --- | --- | --- | --- | --- | --- | --- | --- | --- | --- |
| Shanghai | 8108 | 8251 | 8394 | 8537 | 8681 | 8824 | 8968 | 9112 | 9256 | 9401 | 9545 | 9690 |
| Hangzhou | 4391 | 4558 | 4732 | 4912 | 5100 | 5294 | 5496 | 5705 | 5923 | 6148 | 6383 | 6626 |
| Ningbo | 5828 | 6196 | 6587 | 7002 | 7443 | 7913 | 8412 | 8942 | 9506 | 10106 | 10743 | 11420 |
| Wenzhou | 2494 | 2606 | 2723 | 2845 | 2973 | 3106 | 3246 | 3391 | 3543 | 3702 | 3868 | 4042 |
| Jiaxing | 2906 | 3111 | 3331 | 3566 | 3818 | 4088 | 4376 | 4685 | 5016 | 5370 | 5749 | 6155 |
| Huzhou | 1549 | 1656 | 1771 | 1894 | 2025 | 2165 | 2315 | 2476 | 2648 | 2831 | 3027 | 3237 |
| Shaoxing | 2551 | 2655 | 2764 | 2878 | 2996 | 3119 | 3246 | 3380 | 3518 | 3663 | 3813 | 3969 |
| Jinhua | 1703 | 1770 | 1839 | 1911 | 1986 | 2064 | 2145 | 2229 | 2316 | 2407 | 2501 | 2599 |
| Quzhou | 609 | 627 | 646 | 665 | 683 | 702 | 721 | 739 | 758 | 777 | 796 | 815 |
| Zhoushan | 513 | 532 | 551 | 571 | 590 | 609 | 629 | 648 | 668 | 687 | 707 | 726 |
| Taizhou | 2116 | 2223 | 2335 | 2453 | 2576 | 2706 | 2842 | 2986 | 3136 | 3294 | 3460 | 3634 |
| Lishui | 536 | 554 | 571 | 589 | 607 | 624 | 642 | 660 | 678 | 696 | 713 | 731 |
| Hefei | 3716 | 3894 | 4073 | 4253 | 4434 | 4615 | 4796 | 4978 | 5161 | 5344 | 5528 | 5713 |
| Wuhu | 1807 | 1891 | 1974 | 2058 | 2143 | 2227 | 2312 | 2397 | 2482 | 2568 | 2654 | 2740 |
| Bengbu | 755 | 790 | 826 | 862 | 898 | 934 | 971 | 1007 | 1044 | 1080 | 1117 | 1154 |
| Huainan | 472 | 483 | 494 | 506 | 517 | 528 | 540 | 551 | 562 | 574 | 585 | 597 |
| Ma'anshan | 973 | 1007 | 1042 | 1076 | 1111 | 1146 | 1181 | 1216 | 1251 | 1287 | 1322 | 1357 |
| Huaibei | 472 | 487 | 502 | 518 | 533 | 548 | 564 | 579 | 595 | 611 | 626 | 642 |
| Tongling | 543 | 560 | 578 | 596 | 614 | 632 | 650 | 668 | 686 | 704 | 722 | 740 |
| Anqing | 979 | 1021 | 1063 | 1104 | 1146 | 1188 | 1230 | 1272 | 1315 | 1357 | 1400 | 1442 |
| Mount Huangshan | 268 | 279 | 290 | 301 | 312 | 323 | 334 | 346 | 357 | 368 | 379 | 390 |
| Fuyang | 1221 | 1378 | 1555 | 1756 | 1982 | 2238 | 2526 | 2851 | 3219 | 3633 | 4101 | 4630 |
| Suzhou | 764 | 831 | 904 | 983 | 1070 | 1164 | 1266 | 1378 | 1499 | 1630 | 1774 | 1930 |
| Chuzhou | 1780 | 2038 | 2333 | 2672 | 3059 | 3503 | 4011 | 4592 | 5258 | 6021 | 6894 | 7893 |
| Lu'an | 579 | 602 | 626 | 650 | 674 | 698 | 722 | 746 | 770 | 794 | 818 | 843 |
| Xuancheng | 846 | 928 | 1017 | 1115 | 1222 | 1340 | 1469 | 1610 | 1765 | 1935 | 2121 | 2326 |
| Chizhou | 415 | 454 | 496 | 541 | 591 | 646 | 705 | 770 | 841 | 919 | 1004 | 1096 |
| Bozhou | 703 | 777 | 860 | 951 | 1052 | 1163 | 1286 | 1422 | 1573 | 1740 | 1924 | 2128 |
| Nanjing | 5038 | 5357 | 5697 | 6059 | 6444 | 6853 | 7287 | 7750 | 8242 | 8765 | 9321 | 9913 |
| Suzhou | 8382 | 8750 | 9135 | 9537 | 9957 | 10395 | 10852 | 11330 | 11828 | 12349 | 12892 | 13459 |
| Wuxi | 5109 | 5333 | 5566 | 5810 | 6064 | 6330 | 6607 | 6896 | 7198 | 7513 | 7842 | 8186 |
| Changzhou | 3488 | 3714 | 3954 | 4210 | 4482 | 4772 | 5081 | 5410 | 5760 | 6133 | 6529 | 6952 |
| Zhenjiang | 1889 | 1973 | 2061 | 2153 | 2248 | 2348 | 2453 | 2562 | 2675 | 2794 | 2919 | 3048 |
| Nantong | 4685 | 5059 | 5463 | 5899 | 6370 | 6878 | 7427 | 8020 | 8661 | 9352 | 10099 | 10905 |
| Yangzhou | 2817 | 3017 | 3230 | 3458 | 3703 | 3965 | 4245 | 4545 | 4866 | 5211 | 5579 | 5974 |
| Yancheng | 2402 | 2552 | 2712 | 2882 | 3062 | 3254 | 3458 | 3675 | 3905 | 4150 | 4410 | 4686 |
| Xuzhou | 2833 | 2986 | 3146 | 3315 | 3494 | 3681 | 3879 | 4088 | 4308 | 4540 | 4784 | 5041 |
| Huai'an | 1702 | 1836 | 1979 | 2134 | 2301 | 2482 | 2676 | 2885 | 3111 | 3355 | 3618 | 3901 |
| Lianyungang | 1453 | 1573 | 1702 | 1843 | 1994 | 2159 | 2337 | 2529 | 2737 | 2963 | 3207 | 3471 |
| Taizhou | 2564 | 2745 | 2940 | 3148 | 3371 | 3609 | 3865 | 4138 | 4431 | 4745 | 5081 | 5441 |
| Suqian | 1520 | 1653 | 1797 | 1953 | 2124 | 2309 | 2510 | 2728 | 2966 | 3225 | 3506 | 3811 |

**Table G.4** Low scenario of added value of the tertiary industry in downstream areas

|  | 2024 | 2025 | 2026 | 2027 | 2028 | 2029 | 2030 | 2031 | 2032 | 2033 | 2034 | 2035 |
| --- | --- | --- | --- | --- | --- | --- | --- | --- | --- | --- | --- | --- |
| Shanghai | 28573 | 30868 | 33347 | 36026 | 38919 | 42045 | 45421 | 49069 | 53010 | 57268 | 61867 | 66836 |
| Hangzhou | 12323 | 13593 | 14993 | 16537 | 18240 | 20118 | 22190 | 24476 | 26996 | 29777 | 32844 | 36226 |
| Ningbo | 6509 | 7060 | 7657 | 8305 | 9008 | 9771 | 10598 | 11495 | 12468 | 13524 | 14669 | 15911 |
| Wenzhou | 4032 | 4350 | 4693 | 5063 | 5462 | 5892 | 6357 | 6858 | 7399 | 7982 | 8612 | 9291 |
| Jiaxing | 2602 | 2813 | 3041 | 3287 | 3553 | 3840 | 4151 | 4487 | 4850 | 5242 | 5667 | 6125 |
| Huzhou | 1561 | 1689 | 1827 | 1976 | 2137 | 2312 | 2500 | 2705 | 2925 | 3164 | 3423 | 3702 |
| Shaoxing | 3065 | 3287 | 3525 | 3781 | 4055 | 4349 | 4664 | 5002 | 5365 | 5754 | 6171 | 6618 |
| Jinhua | 2793 | 3014 | 3253 | 3510 | 3788 | 4088 | 4411 | 4761 | 5137 | 5544 | 5983 | 6456 |
| Quzhou | 934 | 1015 | 1103 | 1199 | 1302 | 1415 | 1538 | 1671 | 1815 | 1973 | 2143 | 2329 |
| Zhoushan | 777 | 829 | 885 | 944 | 1008 | 1076 | 1148 | 1225 | 1308 | 1396 | 1490 | 1590 |
| Taizhou | 2684 | 2873 | 3075 | 3292 | 3523 | 3771 | 4036 | 4320 | 4624 | 4950 | 5298 | 5671 |
| Lishui | 921 | 1002 | 1090 | 1186 | 1290 | 1404 | 1527 | 1662 | 1808 | 1967 | 2140 | 2329 |
| Hefei | 7693 | 8846 | 10171 | 11694 | 13446 | 15460 | 17776 | 20439 | 23500 | 27021 | 31068 | 35722 |
| Wuhu | 2346 | 2656 | 3007 | 3405 | 3855 | 4365 | 4942 | 5595 | 6335 | 7172 | 8120 | 9194 |
| Bengbu | 1174 | 1318 | 1480 | 1661 | 1865 | 2094 | 2352 | 2640 | 2965 | 3329 | 3738 | 4197 |
| Huainan | 745 | 827 | 919 | 1021 | 1134 | 1260 | 1399 | 1554 | 1727 | 1918 | 2131 | 2367 |
| Ma'anshan | 1221 | 1367 | 1530 | 1713 | 1917 | 2146 | 2402 | 2689 | 3010 | 3369 | 3771 | 4221 |
| Huaibei | 667 | 753 | 851 | 962 | 1087 | 1228 | 1388 | 1568 | 1772 | 2003 | 2263 | 2557 |
| Tongling | 595 | 660 | 734 | 815 | 905 | 1005 | 1116 | 1240 | 1377 | 1530 | 1699 | 1888 |
| Anqing | 1214 | 1342 | 1485 | 1642 | 1816 | 2009 | 2222 | 2457 | 2718 | 3006 | 3325 | 3677 |
| Mount Huangshan | 538 | 593 | 653 | 720 | 793 | 874 | 962 | 1060 | 1168 | 1287 | 1418 | 1563 |
| Fuyang | 1609 | 1873 | 2179 | 2535 | 2950 | 3432 | 3994 | 4647 | 5408 | 6292 | 7321 | 8519 |
| Suzhou | 1193 | 1337 | 1498 | 1680 | 1883 | 2110 | 2365 | 2651 | 2971 | 3330 | 3733 | 4184 |
| Chuzhou | 1526 | 1796 | 2115 | 2491 | 2933 | 3454 | 4067 | 4789 | 5639 | 6640 | 7818 | 9206 |
| Lu'an | 883 | 978 | 1083 | 1199 | 1328 | 1471 | 1629 | 1804 | 1997 | 2212 | 2450 | 2713 |
| Xuancheng | 771 | 851 | 938 | 1034 | 1140 | 1257 | 1386 | 1528 | 1684 | 1857 | 2047 | 2257 |
| Chizhou | 447 | 492 | 541 | 595 | 655 | 720 | 792 | 871 | 958 | 1054 | 1159 | 1275 |
| Bozhou | 1088 | 1239 | 1412 | 1609 | 1833 | 2088 | 2379 | 2711 | 3089 | 3519 | 4010 | 4569 |
| Nanjing | 9788 | 10673 | 11639 | 12691 | 13839 | 15091 | 16456 | 17944 | 19567 | 21337 | 23267 | 25371 |
| Suzhou | 10599 | 11360 | 12176 | 13050 | 13988 | 14992 | 16069 | 17223 | 18460 | 19786 | 21207 | 22730 |
| Wuxi | 6283 | 6703 | 7150 | 7628 | 8138 | 8681 | 9261 | 9880 | 10540 | 11245 | 11996 | 12797 |
| Changzhou | 4247 | 4603 | 4989 | 5408 | 5861 | 6352 | 6885 | 7462 | 8088 | 8766 | 9501 | 10297 |
| Zhenjiang | 2104 | 2242 | 2388 | 2544 | 2710 | 2888 | 3076 | 3277 | 3491 | 3720 | 3963 | 4222 |
| Nantong | 5176 | 5671 | 6214 | 6809 | 7460 | 8174 | 8956 | 9813 | 10752 | 11781 | 12909 | 14144 |
| Yangzhou | 3161 | 3452 | 3770 | 4116 | 4495 | 4908 | 5359 | 5852 | 6390 | 6978 | 7620 | 8321 |
| Yancheng | 3096 | 3376 | 3681 | 4014 | 4377 | 4773 | 5205 | 5676 | 6189 | 6749 | 7359 | 8025 |
| Xuzhou | 3890 | 4207 | 4551 | 4923 | 5324 | 5759 | 6229 | 6738 | 7288 | 7883 | 8527 | 9223 |
| Huai'an | 2228 | 2441 | 2674 | 2930 | 3211 | 3518 | 3855 | 4224 | 4628 | 5071 | 5556 | 6088 |
| Lianyungang | 1609 | 1755 | 1914 | 2087 | 2276 | 2483 | 2707 | 2953 | 3220 | 3512 | 3830 | 4177 |
| Taizhou | 2727 | 2960 | 3213 | 3488 | 3786 | 4110 | 4461 | 4843 | 5257 | 5706 | 6194 | 6723 |
| Suqian | 1731 | 1916 | 2121 | 2348 | 2599 | 2878 | 3185 | 3526 | 3903 | 4321 | 4783 | 5294 |

**Table G.5** Scenarios for the added value of the tertiary industry in downstream areas

|  | 2024 | 2025 | 2026 | 2027 | 2028 | 2029 | 2030 | 2031 | 2032 | 2033 | 2034 | 2035 |
| --- | --- | --- | --- | --- | --- | --- | --- | --- | --- | --- | --- | --- |
| Shanghai | 29229 | 31809 | 34616 | 37671 | 40996 | 44614 | 48551 | 52836 | 57499 | 62574 | 68097 | 74107 |
| Hangzhou | 12653 | 14085 | 15680 | 17454 | 19429 | 21628 | 24076 | 26801 | 29834 | 33211 | 36970 | 41154 |
| Ningbo | 6663 | 7283 | 7960 | 8701 | 9510 | 10395 | 11361 | 12418 | 13574 | 14836 | 16216 | 17725 |
| Wenzhou | 4123 | 4481 | 4869 | 5291 | 5749 | 6247 | 6788 | 7376 | 8016 | 8710 | 9465 | 10285 |
| Jiaxing | 2662 | 2899 | 3157 | 3438 | 3743 | 4076 | 4439 | 4834 | 5263 | 5731 | 6241 | 6796 |
| Huzhou | 1598 | 1741 | 1897 | 2067 | 2253 | 2455 | 2675 | 2915 | 3177 | 3462 | 3772 | 4111 |
| Shaoxing | 3131 | 3380 | 3649 | 3940 | 4254 | 4593 | 4959 | 5354 | 5781 | 6241 | 6738 | 7275 |
| Jinhua | 2857 | 3105 | 3375 | 3669 | 3988 | 4335 | 4712 | 5122 | 5567 | 6051 | 6578 | 7150 |
| Quzhou | 957 | 1048 | 1147 | 1257 | 1376 | 1507 | 1651 | 1808 | 1980 | 2168 | 2374 | 2600 |
| Zhoushan | 793 | 852 | 914 | 982 | 1055 | 1133 | 1216 | 1306 | 1403 | 1507 | 1618 | 1738 |
| Taizhou | 2741 | 2953 | 3182 | 3427 | 3692 | 3978 | 4285 | 4617 | 4974 | 5358 | 5773 | 6219 |
| Lishui | 943 | 1034 | 1134 | 1244 | 1364 | 1496 | 1641 | 1800 | 1974 | 2165 | 2374 | 2604 |
| Hefei | 7956 | 9266 | 10791 | 12568 | 14637 | 17046 | 19852 | 23120 | 26926 | 31358 | 36520 | 42531 |
| Wuhu | 2420 | 2771 | 3174 | 3635 | 4163 | 4768 | 5461 | 6254 | 7163 | 8203 | 9395 | 10760 |
| Bengbu | 1209 | 1372 | 1557 | 1767 | 2006 | 2276 | 2584 | 2932 | 3328 | 3777 | 4287 | 4866 |
| Huainan | 766 | 859 | 964 | 1081 | 1213 | 1360 | 1526 | 1712 | 1920 | 2154 | 2416 | 2710 |
| Ma'anshan | 1257 | 1422 | 1609 | 1820 | 2058 | 2328 | 2634 | 2979 | 3370 | 3812 | 4312 | 4877 |
| Huaibei | 688 | 786 | 898 | 1026 | 1173 | 1340 | 1532 | 1751 | 2001 | 2286 | 2613 | 2986 |
| Tongling | 611 | 686 | 769 | 863 | 968 | 1085 | 1217 | 1366 | 1532 | 1718 | 1927 | 2162 |
| Anqing | 1247 | 1392 | 1554 | 1735 | 1937 | 2163 | 2415 | 2697 | 3011 | 3362 | 3753 | 4190 |
| Mount Huangshan | 552 | 614 | 683 | 759 | 844 | 938 | 1043 | 1160 | 1290 | 1434 | 1595 | 1773 |
| Fuyang | 1668 | 1967 | 2321 | 2738 | 3231 | 3811 | 4496 | 5305 | 6258 | 7383 | 8710 | 10276 |
| Suzhou | 1228 | 1391 | 1576 | 1785 | 2022 | 2291 | 2595 | 2940 | 3330 | 3772 | 4273 | 4841 |
| Chuzhou | 1584 | 1893 | 2262 | 2704 | 3231 | 3862 | 4615 | 5515 | 6591 | 7877 | 9413 | 11250 |
| Lu'an | 907 | 1014 | 1134 | 1268 | 1418 | 1585 | 1772 | 1981 | 2215 | 2477 | 2769 | 3096 |
| Xuancheng | 792 | 881 | 981 | 1091 | 1214 | 1351 | 1503 | 1672 | 1861 | 2070 | 2304 | 2563 |
| Chizhou | 459 | 509 | 565 | 627 | 696 | 773 | 858 | 952 | 1056 | 1172 | 1301 | 1444 |
| Bozhou | 1123 | 1295 | 1494 | 1722 | 1986 | 2290 | 2641 | 3045 | 3512 | 4049 | 4670 | 5385 |
| Nanjing | 10029 | 11026 | 12122 | 13327 | 14652 | 16108 | 17709 | 19469 | 21404 | 23531 | 25870 | 28441 |
| Suzhou | 10827 | 11681 | 12603 | 13597 | 14671 | 15828 | 17078 | 18425 | 19880 | 21448 | 23141 | 24967 |
| Wuxi | 6412 | 6883 | 7388 | 7931 | 8513 | 9138 | 9809 | 10529 | 11302 | 12132 | 13023 | 13979 |
| Changzhou | 4347 | 4748 | 5185 | 5663 | 6185 | 6754 | 7377 | 8056 | 8799 | 9609 | 10495 | 11462 |
| Zhenjiang | 2147 | 2301 | 2466 | 2643 | 2833 | 3037 | 3255 | 3489 | 3739 | 4008 | 4295 | 4604 |
| Nantong | 5308 | 5866 | 6483 | 7165 | 7919 | 8751 | 9672 | 10689 | 11813 | 13055 | 14428 | 15945 |
| Yangzhou | 3240 | 3568 | 3928 | 4325 | 4762 | 5243 | 5773 | 6357 | 6999 | 7706 | 8485 | 9343 |
| Yancheng | 3172 | 3487 | 3834 | 4215 | 4634 | 5095 | 5601 | 6158 | 6770 | 7443 | 8183 | 8996 |
| Xuzhou | 3980 | 4337 | 4726 | 5150 | 5612 | 6116 | 6665 | 7262 | 7914 | 8624 | 9398 | 10241 |
| Huai'an | 2285 | 2525 | 2790 | 3084 | 3408 | 3767 | 4163 | 4601 | 5084 | 5619 | 6210 | 6863 |
| Lianyungang | 1649 | 1813 | 1994 | 2192 | 2410 | 2650 | 2914 | 3204 | 3523 | 3873 | 4259 | 4683 |
| Taizhou | 2792 | 3054 | 3341 | 3655 | 3999 | 4374 | 4785 | 5235 | 5727 | 6265 | 6853 | 7497 |
| Suqian | 1779 | 1988 | 2221 | 2483 | 2774 | 3100 | 3465 | 3872 | 4327 | 4836 | 5404 | 6039 |

**Table G.6** High scenario of added value of the tertiary industry in downstream areas

|  | 2024 | 2025 | 2026 | 2027 | 2028 | 2029 | 2030 | 2031 | 2032 | 2033 | 2034 | 2035 |
| --- | --- | --- | --- | --- | --- | --- | --- | --- | --- | --- | --- | --- |
| Shanghai | 29894 | 32770 | 35923 | 39378 | 43167 | 47319 | 51871 | 56861 | 62332 | 68328 | 74901 | 82106 |
| Hangzhou | 12989 | 14591 | 16391 | 18414 | 20685 | 23237 | 26103 | 29324 | 32941 | 37005 | 41569 | 46698 |
| Ningbo | 6819 | 7511 | 8272 | 9111 | 10035 | 11053 | 12173 | 13408 | 14767 | 16264 | 17914 | 19730 |
| Wenzhou | 4216 | 4614 | 5050 | 5527 | 6049 | 6620 | 7245 | 7930 | 8679 | 9498 | 10395 | 11377 |
| Jiaxing | 2723 | 2987 | 3277 | 3594 | 3943 | 4325 | 4744 | 5204 | 5709 | 6262 | 6869 | 7535 |
| Huzhou | 1634 | 1794 | 1970 | 2162 | 2374 | 2606 | 2861 | 3140 | 3447 | 3785 | 4155 | 4561 |
| Shaoxing | 3198 | 3476 | 3777 | 4105 | 4462 | 4849 | 5271 | 5728 | 6226 | 6766 | 7354 | 7993 |
| Jinhua | 2921 | 3198 | 3501 | 3833 | 4197 | 4595 | 5030 | 5507 | 6029 | 6601 | 7227 | 7912 |
| Quzhou | 980 | 1081 | 1193 | 1317 | 1454 | 1604 | 1771 | 1954 | 2157 | 2381 | 2628 | 2900 |
| Zhoushan | 809 | 874 | 945 | 1021 | 1103 | 1192 | 1288 | 1392 | 1504 | 1625 | 1756 | 1898 |
| Taizhou | 2799 | 3035 | 3291 | 3568 | 3869 | 4195 | 4548 | 4931 | 5347 | 5798 | 6286 | 6816 |
| Lishui | 966 | 1068 | 1180 | 1305 | 1442 | 1594 | 1762 | 1948 | 2153 | 2380 | 2631 | 2909 |
| Hefei | 8225 | 9701 | 11442 | 13495 | 15916 | 18772 | 22140 | 26113 | 30798 | 36324 | 42842 | 50529 |
| Wuhu | 2495 | 2890 | 3348 | 3878 | 4492 | 5204 | 6028 | 6982 | 8088 | 9369 | 10853 | 12571 |
| Bengbu | 1245 | 1428 | 1638 | 1879 | 2155 | 2472 | 2836 | 3253 | 3732 | 4280 | 4910 | 5632 |
| Huainan | 787 | 892 | 1010 | 1144 | 1296 | 1468 | 1663 | 1883 | 2133 | 2416 | 2737 | 3100 |
| Ma'anshan | 1294 | 1479 | 1690 | 1932 | 2208 | 2524 | 2885 | 3297 | 3768 | 4307 | 4923 | 5627 |
| Huaibei | 709 | 819 | 947 | 1094 | 1264 | 1461 | 1689 | 1951 | 2255 | 2606 | 3012 | 3481 |
| Tongling | 628 | 712 | 806 | 913 | 1034 | 1171 | 1326 | 1502 | 1701 | 1927 | 2183 | 2472 |
| Anqing | 1280 | 1443 | 1626 | 1833 | 2066 | 2328 | 2624 | 2957 | 3332 | 3755 | 4232 | 4770 |
| Mount Huangshan | 567 | 636 | 713 | 800 | 898 | 1008 | 1130 | 1268 | 1423 | 1596 | 1791 | 2009 |
| Fuyang | 1727 | 2066 | 2471 | 2955 | 3534 | 4226 | 5054 | 6044 | 7229 | 8645 | 10339 | 12365 |
| Suzhou | 1264 | 1447 | 1657 | 1897 | 2171 | 2485 | 2845 | 3257 | 3728 | 4268 | 4886 | 5593 |
| Chuzhou | 1644 | 1994 | 2418 | 2932 | 3555 | 4311 | 5227 | 6339 | 7687 | 9321 | 11303 | 13707 |
| Lu'an | 932 | 1052 | 1187 | 1340 | 1512 | 1707 | 1927 | 2175 | 2454 | 2770 | 3127 | 3529 |
| Xuancheng | 813 | 913 | 1025 | 1151 | 1292 | 1451 | 1629 | 1829 | 2054 | 2306 | 2589 | 2907 |
| Chizhou | 471 | 527 | 590 | 661 | 740 | 829 | 928 | 1039 | 1164 | 1303 | 1459 | 1633 |
| Bozhou | 1159 | 1353 | 1579 | 1842 | 2150 | 2509 | 2927 | 3416 | 3986 | 4652 | 5428 | 6334 |
| Nanjing | 10275 | 11388 | 12622 | 13989 | 15505 | 17184 | 19046 | 21110 | 23396 | 25931 | 28740 | 31854 |
| Suzhou | 11057 | 12009 | 13042 | 14163 | 15382 | 16705 | 18142 | 19703 | 21398 | 23238 | 25237 | 27408 |
| Wuxi | 6543 | 7067 | 7632 | 8243 | 8903 | 9615 | 10385 | 11216 | 12114 | 13083 | 14130 | 15261 |
| Changzhou | 4449 | 4896 | 5387 | 5928 | 6524 | 7179 | 7900 | 8693 | 9566 | 10527 | 11584 | 12747 |
| Zhenjiang | 2190 | 2362 | 2547 | 2746 | 2961 | 3193 | 3442 | 3712 | 4002 | 4316 | 4654 | 5018 |
| Nantong | 5443 | 6067 | 6762 | 7537 | 8401 | 9364 | 10437 | 11634 | 12967 | 14454 | 16110 | 17957 |
| Yangzhou | 3320 | 3686 | 4092 | 4543 | 5043 | 5599 | 6215 | 6900 | 7660 | 8504 | 9440 | 10480 |
| Yancheng | 3250 | 3602 | 3992 | 4425 | 4904 | 5435 | 6024 | 6677 | 7400 | 8202 | 9091 | 10075 |
| Xuzhou | 4071 | 4470 | 4907 | 5387 | 5913 | 6492 | 7127 | 7823 | 8589 | 9428 | 10351 | 11363 |
| Huai'an | 2342 | 2611 | 2910 | 3244 | 3616 | 4030 | 4492 | 5007 | 5581 | 6221 | 6934 | 7729 |
| Lianyungang | 1689 | 1873 | 2076 | 2301 | 2551 | 2827 | 3134 | 3474 | 3851 | 4269 | 4732 | 5245 |
| Taizhou | 2858 | 3151 | 3473 | 3829 | 4221 | 4653 | 5130 | 5655 | 6234 | 6873 | 7577 | 8353 |
| Suqian | 1827 | 2061 | 2325 | 2623 | 2959 | 3338 | 3766 | 4248 | 4793 | 5407 | 6099 | 6881 |

**Table G.7** Scenario of low urbanization rate in downstream areas (%)

|  | 2024 | 2025 | 2026 | 2027 | 2028 | 2029 | 2030 | 2031 | 2032 | 2033 | 2034 | 2035 |
| --- | --- | --- | --- | --- | --- | --- | --- | --- | --- | --- | --- | --- |
| Shanghai | 88.24 | 88.25 | 88.26 | 88.26 | 88.27 | 88.28 | 88.29 | 88.30 | 88.30 | 88.31 | 88.32 | 88.33 |
| Hangzhou | 82.35 | 82.79 | 83.20 | 83.59 | 83.96 | 84.31 | 84.64 | 84.95 | 85.25 | 85.54 | 85.82 | 86.08 |
| Ningbo | 78.72 | 79.37 | 80.00 | 80.61 | 81.20 | 81.77 | 82.32 | 82.84 | 83.35 | 83.84 | 84.31 | 84.77 |
| Wenzhou | 73.83 | 74.39 | 74.95 | 75.48 | 76.01 | 76.52 | 77.01 | 77.50 | 77.97 | 78.43 | 78.88 | 79.32 |
| Jiaxing | 74.13 | 75.17 | 76.16 | 77.11 | 78.01 | 78.87 | 79.69 | 80.47 | 81.21 | 81.92 | 82.60 | 83.25 |
| Huzhou | 68.78 | 69.65 | 70.49 | 71.31 | 72.10 | 72.87 | 73.61 | 74.33 | 75.02 | 75.69 | 76.34 | 76.97 |
| Shaoxing | 72.62 | 73.40 | 74.16 | 74.89 | 75.60 | 76.28 | 76.95 | 77.59 | 78.21 | 78.80 | 79.38 | 79.94 |
| Jinhua | 71.04 | 71.69 | 72.32 | 72.94 | 73.54 | 74.12 | 74.69 | 75.25 | 75.79 | 76.32 | 76.83 | 77.33 |
| Quzhou | 62.90 | 63.93 | 64.91 | 65.87 | 66.80 | 67.69 | 68.56 | 69.40 | 70.22 | 71.00 | 71.77 | 72.51 |
| Zhoushan | 72.46 | 73.00 | 73.53 | 74.05 | 74.56 | 75.05 | 75.54 | 76.01 | 76.47 | 76.92 | 77.36 | 77.80 |
| Taizhou | 65.86 | 66.50 | 67.12 | 67.73 | 68.33 | 68.91 | 69.48 | 70.04 | 70.59 | 71.12 | 71.64 | 72.15 |
| Lishui | 65.09 | 65.73 | 66.35 | 66.94 | 67.50 | 68.05 | 68.57 | 69.07 | 69.56 | 70.03 | 70.48 | 70.92 |
| Hefei | 84.67 | 85.60 | 86.47 | 87.27 | 88.02 | 88.71 | 89.35 | 89.95 | 90.50 | 91.02 | 91.50 | 91.94 |
| Wuhu | 71.60 | 72.20 | 72.78 | 73.33 | 73.85 | 74.35 | 74.83 | 75.29 | 75.73 | 76.15 | 76.55 | 76.94 |
| Bengbu | 61.63 | 62.44 | 63.22 | 63.96 | 64.67 | 65.35 | 66.00 | 66.62 | 67.21 | 67.78 | 68.33 | 68.85 |
| Huainan | 65.83 | 66.16 | 66.49 | 66.81 | 67.12 | 67.43 | 67.73 | 68.02 | 68.31 | 68.59 | 68.86 | 69.13 |
| Ma'anshan | 72.74 | 73.30 | 73.83 | 74.34 | 74.82 | 75.29 | 75.73 | 76.16 | 76.57 | 76.96 | 77.34 | 77.70 |
| Huaibei | 68.69 | 69.48 | 70.24 | 70.98 | 71.70 | 72.40 | 73.07 | 73.73 | 74.37 | 74.99 | 75.59 | 76.18 |
| Tongling | 58.28 | 56.94 | 55.52 | 54.01 | 52.41 | 50.69 | 48.86 | 46.90 | 44.79 | 42.52 | 40.07 | 37.42 |
| Anqing | 59.51 | 60.79 | 62.02 | 63.21 | 64.35 | 65.45 | 66.51 | 67.53 | 68.52 | 69.46 | 70.38 | 71.26 |
| Mount Huangshan | 61.54 | 62.71 | 63.85 | 64.94 | 65.99 | 67.00 | 67.98 | 68.93 | 69.84 | 70.72 | 71.56 | 72.38 |
| Fuyang | 46.90 | 47.72 | 48.52 | 49.31 | 50.08 | 50.84 | 51.59 | 52.32 | 53.04 | 53.75 | 54.44 | 55.12 |
| Suzhou | 49.42 | 50.49 | 51.54 | 52.55 | 53.54 | 54.51 | 55.45 | 56.37 | 57.26 | 58.13 | 58.99 | 59.82 |
| Chuzhou | 64.97 | 66.26 | 67.50 | 68.68 | 69.81 | 70.89 | 71.92 | 72.91 | 73.86 | 74.77 | 75.64 | 76.48 |
| Lu'an | 53.33 | 54.39 | 55.41 | 56.41 | 57.38 | 58.33 | 59.25 | 60.15 | 61.02 | 61.87 | 62.70 | 63.51 |
| Xuancheng | 64.81 | 66.03 | 67.19 | 68.31 | 69.38 | 70.40 | 71.39 | 72.34 | 73.25 | 74.13 | 74.96 | 75.77 |
| Chizhou | 61.95 | 62.92 | 63.87 | 64.79 | 65.68 | 66.54 | 67.38 | 68.20 | 68.99 | 69.75 | 70.50 | 71.22 |
| Bozhou | 45.77 | 46.61 | 47.43 | 48.23 | 49.02 | 49.80 | 50.56 | 51.30 | 52.04 | 52.76 | 53.46 | 54.16 |
| Nanjing | 85.95 | 86.27 | 86.59 | 86.88 | 87.16 | 87.43 | 87.68 | 87.92 | 88.15 | 88.37 | 88.58 | 88.79 |
| Suzhou | 82.48 | 83.15 | 83.79 | 84.40 | 84.98 | 85.54 | 86.07 | 86.58 | 87.07 | 87.53 | 87.98 | 88.40 |
| Wuxi | 81.84 | 82.30 | 82.74 | 83.15 | 83.54 | 83.91 | 84.26 | 84.60 | 84.91 | 85.21 | 85.50 | 85.78 |
| Changzhou | 78.78 | 79.55 | 80.29 | 80.99 | 81.67 | 82.32 | 82.94 | 83.54 | 84.11 | 84.65 | 85.18 | 85.68 |
| Zhenjiang | 78.30 | 78.91 | 79.48 | 80.01 | 80.51 | 80.99 | 81.43 | 81.86 | 82.26 | 82.64 | 83.00 | 83.35 |
| Nantong | 73.22 | 74.13 | 75.01 | 75.85 | 76.66 | 77.43 | 78.18 | 78.89 | 79.58 | 80.24 | 80.88 | 81.49 |
| Yangzhou | 73.75 | 74.66 | 75.55 | 76.39 | 77.20 | 77.98 | 78.73 | 79.44 | 80.13 | 80.79 | 81.42 | 82.03 |
| Yancheng | 66.56 | 67.23 | 67.88 | 68.49 | 69.08 | 69.65 | 70.19 | 70.71 | 71.21 | 71.69 | 72.15 | 72.60 |
| Xuzhou | 73.32 | 74.35 | 75.33 | 76.27 | 77.17 | 78.02 | 78.84 | 79.62 | 80.37 | 81.08 | 81.76 | 82.42 |
| Huai'an | 69.65 | 70.69 | 71.69 | 72.64 | 73.56 | 74.45 | 75.29 | 76.11 | 76.89 | 77.64 | 78.36 | 79.06 |
| Lianyungang | 67.18 | 68.08 | 68.94 | 69.78 | 70.59 | 71.37 | 72.13 | 72.87 | 73.59 | 74.28 | 74.95 | 75.60 |
| Taizhou | 71.56 | 72.45 | 73.30 | 74.13 | 74.92 | 75.68 | 76.42 | 77.13 | 77.82 | 78.48 | 79.12 | 79.73 |
| Suqian | 67.21 | 68.29 | 69.33 | 70.33 | 71.30 | 72.22 | 73.11 | 73.97 | 74.79 | 75.58 | 76.35 | 77.08 |

**Table D.8** Urbanization rate in downstream regions, medium scenario (%)

|  | 2024 | 2025 | 2026 | 2027 | 2028 | 2029 | 2030 | 2031 | 2032 | 2033 | 2034 | 2035 |
| --- | --- | --- | --- | --- | --- | --- | --- | --- | --- | --- | --- | --- |
| Shanghai | 88.95 | 88.96 | 88.97 | 88.98 | 88.99 | 89.00 | 89.01 | 89.01 | 89.02 | 89.03 | 89.04 | 89.05 |
| Hangzhou | 83.10 | 83.58 | 84.03 | 84.46 | 84.86 | 85.24 | 85.61 | 85.96 | 86.29 | 86.60 | 86.91 | 87.19 |
| Ningbo | 79.47 | 80.19 | 80.89 | 81.56 | 82.20 | 82.83 | 83.43 | 84.01 | 84.57 | 85.11 | 85.63 | 86.14 |
| Wenzhou | 74.53 | 75.15 | 75.75 | 76.34 | 76.92 | 77.48 | 78.03 | 78.56 | 79.08 | 79.59 | 80.09 | 80.57 |
| Jiaxing | 74.92 | 76.07 | 77.16 | 78.20 | 79.19 | 80.14 | 81.05 | 81.91 | 82.73 | 83.52 | 84.27 | 84.99 |
| Huzhou | 69.49 | 70.45 | 71.38 | 72.28 | 73.15 | 74.00 | 74.81 | 75.61 | 76.37 | 77.12 | 77.84 | 78.53 |
| Shaoxing | 73.35 | 74.21 | 75.04 | 75.85 | 76.63 | 77.38 | 78.11 | 78.82 | 79.50 | 80.16 | 80.80 | 81.42 |
| Jinhua | 71.73 | 72.45 | 73.14 | 73.82 | 74.48 | 75.12 | 75.75 | 76.36 | 76.96 | 77.54 | 78.10 | 78.66 |
| Quzhou | 63.60 | 64.72 | 65.81 | 66.87 | 67.89 | 68.88 | 69.84 | 70.77 | 71.67 | 72.55 | 73.39 | 74.21 |
| Zhoushan | 73.14 | 73.74 | 74.32 | 74.89 | 75.45 | 75.99 | 76.52 | 77.04 | 77.55 | 78.05 | 78.54 | 79.01 |
| Taizhou | 66.51 | 67.21 | 67.89 | 68.56 | 69.22 | 69.86 | 70.49 | 71.11 | 71.71 | 72.30 | 72.88 | 73.44 |
| Lishui | 65.74 | 66.44 | 67.12 | 67.76 | 68.39 | 68.99 | 69.56 | 70.12 | 70.65 | 71.17 | 71.67 | 72.15 |
| Hefei | 85.54 | 86.56 | 87.51 | 88.40 | 89.22 | 89.98 | 90.69 | 91.35 | 91.96 | 92.53 | 93.06 | 93.55 |
| Wuhu | 72.29 | 72.95 | 73.59 | 74.19 | 74.76 | 75.31 | 75.84 | 76.35 | 76.83 | 77.29 | 77.74 | 78.17 |
| Bengbu | 62.28 | 63.18 | 64.03 | 64.85 | 65.63 | 66.38 | 67.09 | 67.78 | 68.43 | 69.06 | 69.67 | 70.25 |
| Huainan | 66.42 | 66.78 | 67.14 | 67.49 | 67.84 | 68.17 | 68.50 | 68.83 | 69.14 | 69.45 | 69.76 | 70.05 |
| Ma'anshan | 73.43 | 74.04 | 74.63 | 75.18 | 75.72 | 76.23 | 76.72 | 77.19 | 77.64 | 78.07 | 78.49 | 78.89 |
| Huaibei | 69.39 | 70.25 | 71.09 | 71.91 | 72.70 | 73.47 | 74.21 | 74.94 | 75.65 | 76.33 | 77.00 | 77.65 |
| Tongling | 58.93 | 57.68 | 56.35 | 54.93 | 53.42 | 51.80 | 50.07 | 48.21 | 46.20 | 44.03 | 41.68 | 39.12 |
| Anqing | 60.23 | 61.64 | 62.99 | 64.30 | 65.57 | 66.79 | 67.96 | 69.10 | 70.19 | 71.25 | 72.27 | 73.25 |
| Mount Huangshan | 62.26 | 63.55 | 64.79 | 66.00 | 67.16 | 68.28 | 69.37 | 70.41 | 71.42 | 72.40 | 73.35 | 74.26 |
| Fuyang | 47.42 | 48.32 | 49.21 | 50.08 | 50.93 | 51.77 | 52.60 | 53.41 | 54.21 | 54.99 | 55.76 | 56.52 |
| Suzhou | 50.02 | 51.20 | 52.35 | 53.47 | 54.56 | 55.63 | 56.68 | 57.70 | 58.69 | 59.66 | 60.61 | 61.54 |
| Chuzhou | 65.74 | 67.16 | 68.52 | 69.82 | 71.07 | 72.27 | 73.41 | 74.51 | 75.57 | 76.58 | 77.55 | 78.48 |
| Lu'an | 53.96 | 55.12 | 56.25 | 57.35 | 58.42 | 59.47 | 60.49 | 61.49 | 62.46 | 63.40 | 64.33 | 65.22 |
| Xuancheng | 65.57 | 66.90 | 68.18 | 69.41 | 70.59 | 71.73 | 72.82 | 73.88 | 74.89 | 75.86 | 76.79 | 77.69 |
| Chizhou | 62.63 | 63.70 | 64.74 | 65.75 | 66.74 | 67.69 | 68.62 | 69.52 | 70.40 | 71.25 | 72.07 | 72.87 |
| Bozhou | 46.29 | 47.21 | 48.11 | 49.00 | 49.87 | 50.73 | 51.57 | 52.40 | 53.21 | 54.01 | 54.80 | 55.57 |
| Nanjing | 86.70 | 87.06 | 87.40 | 87.73 | 88.03 | 88.33 | 88.61 | 88.87 | 89.12 | 89.37 | 89.60 | 89.82 |
| Suzhou | 83.28 | 84.01 | 84.71 | 85.38 | 86.02 | 86.64 | 87.22 | 87.78 | 88.32 | 88.83 | 89.32 | 89.79 |
| Wuxi | 82.59 | 83.10 | 83.58 | 84.03 | 84.46 | 84.86 | 85.25 | 85.62 | 85.96 | 86.30 | 86.61 | 86.92 |
| Changzhou | 79.56 | 80.40 | 81.22 | 81.99 | 82.74 | 83.45 | 84.14 | 84.79 | 85.42 | 86.03 | 86.61 | 87.16 |
| Zhenjiang | 79.05 | 79.72 | 80.34 | 80.93 | 81.48 | 82.00 | 82.49 | 82.96 | 83.40 | 83.82 | 84.22 | 84.60 |
| Nantong | 73.98 | 74.98 | 75.95 | 76.87 | 77.76 | 78.62 | 79.44 | 80.23 | 80.99 | 81.72 | 82.42 | 83.10 |
| Yangzhou | 74.51 | 75.52 | 76.49 | 77.42 | 78.31 | 79.17 | 80.00 | 80.79 | 81.55 | 82.28 | 82.98 | 83.65 |
| Yancheng | 67.22 | 67.96 | 68.67 | 69.35 | 70.00 | 70.62 | 71.22 | 71.79 | 72.34 | 72.87 | 73.38 | 73.88 |
| Xuzhou | 74.11 | 75.24 | 76.32 | 77.35 | 78.34 | 79.28 | 80.19 | 81.05 | 81.88 | 82.67 | 83.42 | 84.15 |
| Huai'an | 70.41 | 71.55 | 72.65 | 73.70 | 74.71 | 75.69 | 76.62 | 77.52 | 78.39 | 79.22 | 80.02 | 80.79 |
| Lianyungang | 67.89 | 68.87 | 69.82 | 70.74 | 71.64 | 72.50 | 73.34 | 74.16 | 74.95 | 75.71 | 76.45 | 77.17 |
| Taizhou | 72.30 | 73.28 | 74.22 | 75.12 | 76.00 | 76.84 | 77.66 | 78.44 | 79.20 | 79.93 | 80.64 | 81.32 |
| Suqian | 67.96 | 69.15 | 70.29 | 71.39 | 72.45 | 73.48 | 74.46 | 75.41 | 76.32 | 77.20 | 78.05 | 78.86 |

**Table G.9** Scenario of high urbanization rate in downstream areas (%)

|  | 2024 | 2025 | 2026 | 2027 | 2028 | 2029 | 2030 | 2031 | 2032 | 2033 | 2034 | 2035 |
| --- | --- | --- | --- | --- | --- | --- | --- | --- | --- | --- | --- | --- |
| Shanghai | 89.67 | 89.68 | 89.68 | 89.69 | 89.70 | 89.71 | 89.72 | 89.73 | 89.74 | 89.75 | 89.76 | 89.77 |
| Hangzhou | 83.85 | 84.37 | 84.86 | 85.33 | 85.77 | 86.19 | 86.59 | 86.97 | 87.33 | 87.67 | 88.00 | 88.32 |
| Ningbo | 80.23 | 81.02 | 81.77 | 82.51 | 83.21 | 83.89 | 84.55 | 85.19 | 85.80 | 86.40 | 86.97 | 87.52 |
| Wenzhou | 75.23 | 75.90 | 76.56 | 77.21 | 77.84 | 78.45 | 79.05 | 79.63 | 80.21 | 80.76 | 81.31 | 81.84 |
| Jiaxing | 75.72 | 76.97 | 78.16 | 79.30 | 80.39 | 81.43 | 82.42 | 83.37 | 84.28 | 85.14 | 85.97 | 86.76 |
| Huzhou | 70.21 | 71.26 | 72.27 | 73.26 | 74.21 | 75.14 | 76.03 | 76.90 | 77.75 | 78.56 | 79.35 | 80.12 |
| Shaoxing | 74.08 | 75.02 | 75.93 | 76.81 | 77.66 | 78.49 | 79.29 | 80.06 | 80.81 | 81.54 | 82.24 | 82.92 |
| Jinhua | 72.43 | 73.20 | 73.96 | 74.70 | 75.42 | 76.13 | 76.81 | 77.48 | 78.14 | 78.77 | 79.40 | 80.00 |
| Quzhou | 64.30 | 65.53 | 66.72 | 67.87 | 68.99 | 70.08 | 71.14 | 72.16 | 73.15 | 74.12 | 75.05 | 75.96 |
| Zhoushan | 73.82 | 74.47 | 75.11 | 75.73 | 76.34 | 76.94 | 77.52 | 78.09 | 78.65 | 79.19 | 79.72 | 80.25 |
| Taizhou | 67.16 | 67.92 | 68.67 | 69.40 | 70.12 | 70.82 | 71.51 | 72.18 | 72.84 | 73.49 | 74.12 | 74.75 |
| Lishui | 66.39 | 67.15 | 67.89 | 68.60 | 69.28 | 69.93 | 70.56 | 71.17 | 71.76 | 72.33 | 72.88 | 73.41 |
| Hefei | 86.41 | 87.53 | 88.56 | 89.53 | 90.43 | 91.26 | 92.04 | 92.76 | 93.43 | 94.06 | 94.64 | 95.17 |
| Wuhu | 72.99 | 73.71 | 74.40 | 75.05 | 75.68 | 76.29 | 76.86 | 77.41 | 77.94 | 78.45 | 78.94 | 79.41 |
| Bengbu | 62.93 | 63.91 | 64.85 | 65.74 | 66.60 | 67.41 | 68.20 | 68.95 | 69.67 | 70.37 | 71.03 | 71.67 |
| Huainan | 67.01 | 67.41 | 67.80 | 68.18 | 68.56 | 68.93 | 69.28 | 69.64 | 69.98 | 70.32 | 70.65 | 70.98 |
| Ma'anshan | 74.13 | 74.79 | 75.43 | 76.04 | 76.62 | 77.18 | 77.71 | 78.23 | 78.72 | 79.20 | 79.65 | 80.10 |
| Huaibei | 70.09 | 71.03 | 71.95 | 72.84 | 73.70 | 74.55 | 75.36 | 76.16 | 76.94 | 77.69 | 78.42 | 79.13 |
| Tongling | 59.58 | 58.42 | 57.18 | 55.86 | 54.44 | 52.93 | 51.30 | 49.54 | 47.64 | 45.59 | 43.35 | 40.90 |
| Anqing | 60.95 | 62.49 | 63.98 | 65.42 | 66.81 | 68.15 | 69.44 | 70.70 | 71.90 | 73.07 | 74.20 | 75.29 |
| Mount Huangshan | 62.98 | 64.39 | 65.75 | 67.07 | 68.35 | 69.58 | 70.77 | 71.93 | 73.04 | 74.12 | 75.16 | 76.17 |
| Fuyang | 47.95 | 48.94 | 49.91 | 50.86 | 51.79 | 52.72 | 53.63 | 54.52 | 55.40 | 56.26 | 57.11 | 57.95 |
| Suzhou | 50.62 | 51.91 | 53.16 | 54.39 | 55.60 | 56.77 | 57.92 | 59.05 | 60.15 | 61.23 | 62.28 | 63.31 |
| Chuzhou | 66.51 | 68.06 | 69.55 | 70.98 | 72.35 | 73.67 | 74.93 | 76.14 | 77.31 | 78.42 | 79.49 | 80.52 |
| Lu'an | 54.58 | 55.85 | 57.09 | 58.30 | 59.48 | 60.63 | 61.75 | 62.85 | 63.92 | 64.97 | 65.99 | 66.98 |
| Xuancheng | 66.32 | 67.78 | 69.18 | 70.53 | 71.83 | 73.08 | 74.28 | 75.44 | 76.55 | 77.62 | 78.66 | 79.65 |
| Chizhou | 63.31 | 64.48 | 65.62 | 66.73 | 67.81 | 68.85 | 69.87 | 70.86 | 71.83 | 72.77 | 73.68 | 74.56 |
| Bozhou | 46.82 | 47.82 | 48.81 | 49.78 | 50.74 | 51.68 | 52.61 | 53.52 | 54.41 | 55.30 | 56.17 | 57.02 |
| Nanjing | 87.46 | 87.85 | 88.22 | 88.58 | 88.91 | 89.23 | 89.53 | 89.82 | 90.10 | 90.37 | 90.62 | 90.86 |
| Suzhou | 84.07 | 84.87 | 85.63 | 86.37 | 87.07 | 87.74 | 88.38 | 88.99 | 89.58 | 90.14 | 90.68 | 91.19 |
| Wuxi | 83.34 | 83.89 | 84.42 | 84.91 | 85.38 | 85.82 | 86.24 | 86.64 | 87.02 | 87.39 | 87.73 | 88.06 |
| Changzhou | 80.34 | 81.26 | 82.15 | 83.00 | 83.81 | 84.60 | 85.35 | 86.06 | 86.75 | 87.42 | 88.05 | 88.66 |
| Zhenjiang | 79.80 | 80.53 | 81.21 | 81.85 | 82.45 | 83.02 | 83.56 | 84.07 | 84.56 | 85.02 | 85.45 | 85.87 |
| Nantong | 74.75 | 75.84 | 76.89 | 77.90 | 78.88 | 79.81 | 80.71 | 81.58 | 82.42 | 83.22 | 83.99 | 84.74 |
| Yangzhou | 75.28 | 76.38 | 77.44 | 78.46 | 79.44 | 80.38 | 81.28 | 82.15 | 82.98 | 83.79 | 84.56 | 85.30 |
| Yancheng | 67.89 | 68.70 | 69.47 | 70.21 | 70.92 | 71.60 | 72.26 | 72.89 | 73.49 | 74.07 | 74.63 | 75.17 |
| Xuzhou | 74.90 | 76.13 | 77.31 | 78.44 | 79.52 | 80.56 | 81.55 | 82.50 | 83.41 | 84.28 | 85.11 | 85.91 |
| Huai'an | 71.17 | 72.42 | 73.61 | 74.77 | 75.88 | 76.95 | 77.97 | 78.96 | 79.92 | 80.83 | 81.71 | 82.56 |
| Lianyungang | 68.60 | 69.67 | 70.71 | 71.72 | 72.70 | 73.65 | 74.57 | 75.46 | 76.33 | 77.17 | 77.99 | 78.78 |
| Taizhou | 73.05 | 74.11 | 75.14 | 76.13 | 77.09 | 78.01 | 78.90 | 79.77 | 80.60 | 81.40 | 82.18 | 82.93 |
| Suqian | 68.70 | 70.00 | 71.26 | 72.46 | 73.63 | 74.75 | 75.83 | 76.87 | 77.88 | 78.84 | 79.78 | 80.68 |
